# Supplementary material
Source: PubMed Central journal article supplement (PMC3262230)
Supplement: NIHMS329020-supplement-1.pdf [file NIHMS329020-supplement-1.pdf]

# Genetic variation near *IRS1* associates with reduced adiposity and an impaired metabolic profile

Tuomas O Kilpeläinen, M Carola Zillikens, Alena Stančáková, Francis M Finucane, Janina S Ried *et al.*\*

\* A full list of author names appears in the main paper.

---

## SUPPLEMENTARY INFORMATION

---

|                                            |              |
|--------------------------------------------|--------------|
| <b>1. SUPPLEMENTARY TABLES AND FIGURES</b> | <b>P. 2</b>  |
| 1.1 Supplementary Tables                   | P. 2         |
| 1.2 Supplementary Figures                  | P. 12        |
| <b>2. SUPPLEMENTARY NOTE</b>               | <b>P. 20</b> |
| 2.1. Supplementary Note - Tables           | p. 20        |
| 2.2. Author Contributions                  | p. 31        |
| 2.3. Acknowledgements                      | p. 33        |
| 2.4. Competing interests statement         | p. 37        |

# 1. SUPPLEMENTARY TABLES AND FIGURES

## 1.1. SUPPLEMENTARY TABLES

- Supplementary Table 1** Stage 1 results for the 14 SNPs that reached an association  $P$  value  $< 10^{-6}$  with body fat percentage in the stage 1 genome-wide association meta-analysis and were taken forward for follow-up.
- Supplementary Table 2** Association of the 14 SNPs that were taken forward for replication from stage 1 with body fat percentage in a meta-analysis of stage 2 follow-up studies.
- Supplementary Table 3** Association of the 14 SNPs that were taken forward for replication from stage 1 with body fat percentage in the combined meta-analysis of stage 1 and stage 2.
- Supplementary Table 4** Comparison of the combined stage 1 and stage 2 results for the rs2943650 SNP near *IRS1*, rs534870 SNP near *SPRY2*, and rs8050136 SNP in *FTO* in meta-analyses of 'European individuals only' vs. 'Europeans and Indian-Asians combined'
- Supplementary Table 5** Association of the body fat percentage decreasing (T) allele of rs2943650 near *IRS1* with anthropometric traits in a meta-analysis of stage 2 follow-up studies.
- Supplementary Table 6** Association of the body fat percentage decreasing (T) allele of rs2943650 near *IRS1* with blood lipids, insulin sensitivity traits, leptin, and adiponectin in a meta-analysis of stage 2 and stage 3 follow-up studies.
- Supplementary Table 7** Significant associations ( $P < 0.05$ ) of the rs2943650 SNP near *IRS1* and the rs534870 SNP near *SPRY2* with *cis* gene expression (*cis*-eQTLs) in subcutaneous adipose tissue, omental adipose tissue, blood, and liver.
- Supplementary Table 8** Association of the body fat percentage increasing (G) allele of rs534870 near *SPRY2* with anthropometric traits and blood lipids in a meta-analysis of stage 2 follow-up studies.
- Supplementary Table 9** Association of established susceptibility loci for BMI, waist circumference, extreme obesity, and waist-to-hip ratio with body fat percentage in the stage 1 genome-wide association meta-analysis.

**Supplementary Table 1** Stage 1 results for the 14 SNPs that reached an association  $P$  value  $< 10^{-6}$  with body fat percentage in the stage 1 genome-wide association meta-analysis and were taken forward for follow-up

| Chr | Nearby Gene     | Lead SNP   | Position (bp) | Alleles |       | Stage 1<br>All individuals (n=36,626)<br>(includes 7,557 Indian Asians) |          |       |                       | Stage 1<br>Europeans (n=29,069) |          |       |                       | Stage 1<br>Men (n=19,815)<br>(includes 6,535 Indian Asians) |          |       |                      | Stage 1<br>Women (n=16,811)<br>(includes 1,022 Indian Asians) |          |        |                      |
|-----|-----------------|------------|---------------|---------|-------|-------------------------------------------------------------------------|----------|-------|-----------------------|---------------------------------|----------|-------|-----------------------|-------------------------------------------------------------|----------|-------|----------------------|---------------------------------------------------------------|----------|--------|----------------------|
|     |                 |            |               | Effect  | Other | n                                                                       | Freq (%) | beta  | P                     | n                               | Freq (%) | beta  | P                     | n                                                           | Freq (%) | beta  | P                    | n                                                             | Freq (%) | beta   | P                    |
| 1   | <i>GRIK3</i>    | rs12739617 | 36,945,244    | G       | C     | 35803                                                                   | 86       | 0.048 | $3.2 \times 10^{-5}$  | 28246                           | 90       | 0.069 | $8.6 \times 10^{-7}$  | 19388                                                       | 86       | 0.046 | $2.4 \times 10^{-3}$ | 16415                                                         | 89       | 0.042  | $2.4 \times 10^{-2}$ |
| 2   | <i>IRS1</i>     | rs2943650  | 226,814,165   | C       | T     | 36574                                                                   | 36       | 0.044 | $7.9 \times 10^{-9}$  | 29017                           | 37       | 0.039 | $3.1 \times 10^{-6}$  | 19751                                                       | 35       | 0.059 | $4.1 \times 10^{-8}$ | 16823                                                         | 36       | 0.034  | $2.7 \times 10^{-3}$ |
| 2   | <i>SNED1</i>    | rs7425888  | 241,575,678   | A       | G     | 33997                                                                   | 15       | 0.029 | $7.1 \times 10^{-3}$  | 26713                           | 13       | 0.016 | $2.2 \times 10^{-1}$  | 18859                                                       | 16       | 0.077 | $1.4 \times 10^{-7}$ | 15138                                                         | 14       | -0.027 | $1.1 \times 10^{-1}$ |
| 5   | <i>HTR1A</i>    | rs7736910  | 63,076,529    | G       | A     | 32629                                                                   | 50       | 0.039 | $5.9 \times 10^{-7}$  | 27275                           | 48       | 0.045 | $2.0 \times 10^{-7}$  | 16706                                                       | 52       | 0.029 | $1.0 \times 10^{-2}$ | 15924                                                         | 49       | 0.048  | $4.0 \times 10^{-5}$ |
| 5   | <i>MARCH3</i>   | rs7738021  | 126,230,059   | G       | T     | 32629                                                                   | 68       | 0.033 | $1.9 \times 10^{-4}$  | 27275                           | 71       | 0.036 | $2.6 \times 10^{-4}$  | 16706                                                       | 66       | 0.009 | $4.5 \times 10^{-1}$ | 15924                                                         | 69       | 0.065  | $9.9 \times 10^{-7}$ |
| 6   | <i>WISP3</i>    | rs6909893  | 112,466,236   | A       | G     | 34831                                                                   | 26       | 0.045 | $7.6 \times 10^{-7}$  | 27274                           | 28       | 0.043 | $9.9 \times 10^{-6}$  | 18908                                                       | 25       | 0.059 | $6.5 \times 10^{-6}$ | 15923                                                         | 27       | 0.028  | $3.6 \times 10^{-2}$ |
| 8   | <i>PPP1R3B</i>  | rs17706711 | 9,116,692     | A       | T     | 29050                                                                   | 81       | 0.060 | $1.5 \times 10^{-7}$  | 27274                           | 81       | 0.060 | $1.5 \times 10^{-7}$  | 13240                                                       | 82       | 0.070 | $9.4 \times 10^{-5}$ | 15811                                                         | 82       | 0.051  | $1.4 \times 10^{-3}$ |
| 8   | <i>RP1L1</i>    | rs9657518  | 10,504,999    | C       | T     | 34558                                                                   | 39       | 0.038 | $1.9 \times 10^{-5}$  | 27274                           | 34       | 0.050 | $7.4 \times 10^{-7}$  | 18635                                                       | 41       | 0.035 | $3.4 \times 10^{-3}$ | 15923                                                         | 35       | 0.036  | $8.3 \times 10^{-3}$ |
| 8   | <i>FDFT1</i>    | rs17149412 | 11,719,247    | C       | T     | 32628                                                                   | 28       | 0.044 | $8.8 \times 10^{-7}$  | 27274                           | 27       | 0.054 | $7.5 \times 10^{-8}$  | 16705                                                       | 29       | 0.032 | $1.1 \times 10^{-2}$ | 15923                                                         | 27       | 0.054  | $6.3 \times 10^{-5}$ |
| 8   | <i>SLC39A14</i> | rs12674913 | 22,319,562    | G       | C     | 36612                                                                   | 69       | 0.043 | $1.6 \times 10^{-7}$  | 29055                           | 72       | 0.035 | $1.4 \times 10^{-4}$  | 19777                                                       | 68       | 0.046 | $4.0 \times 10^{-5}$ | 16835                                                         | 71       | 0.043  | $6.0 \times 10^{-4}$ |
| 10  | <i>GFRA1</i>    | rs180585   | 117,797,907   | C       | T     | 36603                                                                   | 84       | 0.049 | $7.9 \times 10^{-7}$  | 29046                           | 84       | 0.054 | $1.1 \times 10^{-6}$  | 19726                                                       | 84       | 0.026 | $6.5 \times 10^{-2}$ | 16830                                                         | 84       | 0.074  | $6.7 \times 10^{-7}$ |
| 13  | <i>SPRY2</i>    | rs534870   | 79,857,208    | G       | A     | 36488                                                                   | 33       | 0.036 | $3.2 \times 10^{-6}$  | 28931                           | 31       | 0.044 | $7.9 \times 10^{-7}$  | 19726                                                       | 35       | 0.034 | $1.6 \times 10^{-3}$ | 16763                                                         | 32       | 0.039  | $9.0 \times 10^{-4}$ |
| 16  | <i>FTO</i>      | rs8050136  | 52,373,776    | A       | C     | 36537                                                                   | 39       | 0.063 | $3.9 \times 10^{-17}$ | 28980                           | 41       | 0.067 | $4.6 \times 10^{-16}$ | 19739                                                       | 38       | 0.058 | $2.5 \times 10^{-8}$ | 16798                                                         | 40       | 0.063  | $1.2 \times 10^{-8}$ |
| 18  | <i>MC4R</i>     | rs590215   | 56,055,068    | T       | C     | 36571                                                                   | 31       | 0.034 | $1.9 \times 10^{-5}$  | 29014                           | 29       | 0.025 | $5.4 \times 10^{-3}$  | 19752                                                       | 32       | 0.055 | $4.6 \times 10^{-7}$ | 16820                                                         | 29       | 0.013  | $2.8 \times 10^{-1}$ |

Body fat percentage was inverse normal transformed to approximate normality (mean = 0, sd = 1) in men and women separately. Alleles, effect is the fat % increasing allele, other is the fat % decreasing allele; beta, change in inverse normal transformed body fat percentage per effect allele; Chr/Position: the chromosome and position (in Build 36) of the SNP; Freq, frequency of the effect allele; Nearby Gene, gene nearest the SNP used in analyses.

**Supplementary Table 2** Association of the 14 SNPs that were taken forward for replication from stage 1 with body fat percentage in a meta-analysis of stage 2 follow-up studies

| Chr | Nearby Gene     | Lead SNP   | Position (bp) | Alleles |       | Proxy SNP               | r <sup>2</sup><br>between<br>lead and<br>proxy | Stage 2<br>All individuals |          |        |                       | Stage 2<br>Men |          |        |                      | Stage 2<br>Women |          |        |                      |
|-----|-----------------|------------|---------------|---------|-------|-------------------------|------------------------------------------------|----------------------------|----------|--------|-----------------------|----------------|----------|--------|----------------------|------------------|----------|--------|----------------------|
|     |                 |            |               | Effect  | Other |                         |                                                | n                          | Freq (%) | beta   | P                     | n              | Freq (%) | beta   | P                    | n                | Freq (%) | beta   | P                    |
| 1   | <i>GRIK3</i>    | rs12739617 | 36,945,244    | G       | C     | rs7554980<br>rs12063010 | 1<br>1                                         | 34,254                     | 88       | 0.015  | 1.8x10 <sup>-1</sup>  | 20,490         | 88       | 0.009  | 5.2x10 <sup>-1</sup> | 13,764           | 89       | 0.026  | 1.7x10 <sup>-1</sup> |
| 2   | <i>IRS1</i>     | rs2943650  | 226,814,165   | C       | T     | rs2972143<br>rs2943634  | 1<br>0.83                                      | 39,576                     | 36       | 0.025  | 1.9x10 <sup>-4</sup>  | 24,047         | 36       | 0.035  | 3.4x10 <sup>-5</sup> | 15,529           | 36       | 0.008  | 4.7x10 <sup>-1</sup> |
| 2   | <i>SNED1</i>    | rs7425888  | 241,575,678   | A       | G     | rs4521036               | 1                                              | 34,392                     | 14       | 0.021  | 4.1x10 <sup>-2</sup>  | 20,562         | 13       | 0.016  | 2.3x10 <sup>-1</sup> | 13,830           | 14       | 0.029  | 7.9x10 <sup>-2</sup> |
| 5   | <i>HTR1A</i>    | rs7736910  | 63,076,529    | G       | A     | rs10805383              | 1                                              | 24,407                     | 55       | 0.015  | 7.9x10 <sup>-2</sup>  | 15,506         | 57       | 0.010  | 1.6x10 <sup>-1</sup> | 8,901            | 50       | 0.015  | 2.9x10 <sup>-1</sup> |
| 5   | <i>MARCH3</i>   | rs7738021  | 126,230,059   | G       | T     |                         |                                                | 24,437                     | 64       | -0.003 | 7.5x10 <sup>-1</sup>  | 15,543         | 62       | 0.004  | 6.8x10 <sup>-1</sup> | 8,894            | 67       | -0.018 | 2.4x10 <sup>-1</sup> |
| 6   | <i>WISP3</i>    | rs6909893  | 112,466,236   | A       | G     | rs2280153               | 0.85                                           | 34,428                     | 26       | 0.022  | 6.9x10 <sup>-3</sup>  | 20,555         | 24       | 0.023  | 3.1x10 <sup>-2</sup> | 13,873           | 28       | 0.021  | 1.0x10 <sup>-1</sup> |
| 8   | <i>PPP1R3B</i>  | rs17706711 | 9,116,692     | A       | T     | rs2929313               | 1                                              | 34,403                     | 83       | -0.003 | 7.6x10 <sup>-1</sup>  | 20,550         | 84       | 0.001  | 9.2x10 <sup>-1</sup> | 13,853           | 82       | -0.009 | 5.5x10 <sup>-1</sup> |
| 8   | <i>R1P1L1</i>   | rs9657518  | 10,504,999    | C       | T     |                         |                                                | 34,556                     | 45       | 0.004  | 6.3x10 <sup>-1</sup>  | 20,632         | 49       | 0.006  | 5.0x10 <sup>-1</sup> | 13,924           | 62       | -0.001 | 9.4x10 <sup>-1</sup> |
| 8   | <i>FDFT1</i>    | rs17149412 | 11,719,247    | C       | T     |                         |                                                | 24,435                     | 33       | -0.005 | 5.7x10 <sup>-1</sup>  | 15,534         | 34       | -0.005 | 6.7x10 <sup>-1</sup> | 8,901            | 27       | -0.017 | 2.9x10 <sup>-1</sup> |
| 8   | <i>SLC39A14</i> | rs12674913 | 22,319,562    | G       | C     | rs2293145<br>rs13256933 | 1<br>1                                         | 31,715                     | 71       | 0.013  | 9.9x10 <sup>-2</sup>  | 17,804         | 70       | 0.017  | 1.1x10 <sup>-1</sup> | 13,911           | 72       | 0.008  | 5.2x10 <sup>-1</sup> |
| 10  | <i>GFRA1</i>    | rs180585   | 117,797,907   | C       | T     | rs180566                | 1                                              | 34,405                     | 84       | 0.012  | 2.2x10 <sup>-1</sup>  | 20,574         | 83       | 0.010  | 4.3x10 <sup>-1</sup> | 13,831           | 84       | 0.015  | 3.3x10 <sup>-1</sup> |
| 13  | <i>SPRY2</i>    | rs534870   | 79,857,208    | G       | A     |                         |                                                | 34,342                     | 30       | 0.023  | 2.6x10 <sup>-3</sup>  | 20,537         | 30       | 0.030  | 2.1x10 <sup>-3</sup> | 13,805           | 30       | 0.012  | 3.4x10 <sup>-1</sup> |
| 16  | <i>FTO</i>      | rs8050136  | 52,373,776    | A       | C     | rs9939609<br>rs1121980  | 1<br>0.85                                      | 34,105                     | 40       | 0.047  | 4.4x10 <sup>-11</sup> | 20,624         | 41       | 0.045  | 6.0x10 <sup>-7</sup> | 13,481           | 40       | 0.051  | 1.6x10 <sup>-5</sup> |
| 18  | <i>MC4R</i>     | rs590215   | 56,055,068    | T       | C     | rs17782313              | 0.71                                           | 33,826                     | 24       | 0.017  | 4.2x10 <sup>-2</sup>  | 20,244         | 22       | 0.024  | 3.1x10 <sup>-2</sup> | 13,582           | 26       | 0.008  | 5.8x10 <sup>-1</sup> |

All individuals were of white European descent. Body fat percentage was inverse normal transformed to approximate normality (mean = 0, sd = 1) in men and women separately. Alleles, effect is the fat % increasing allele, other is the fat % decreasing allele; beta, change in inverse normal transformed body fat percentage per effect allele; Chr/Position, the chromosome and position (in Build 36) of the SNP; Freq, frequency of the effect allele; Nearby Gene, gene nearest the SNP used in analyses

**Supplementary Table 3** Association of the 14 SNPs that were taken forward for replication from stage 1 with body fat percentage in the combined meta-analysis of stage 1 and stage 2

| Chr | Nearby Gene     | SNP        | Position (bp) | Alleles |       | Stage 1 + 2<br>All individuals<br>(includes 7,557 Indian Asians) |          |       |                       | Stage 1 + 2<br>Europeans |          |       |                       | Stage 1 + 2<br>Men<br>(includes 6,535 Indian Asians) |          |       |                       | Stage 1 + 2<br>Women<br>(includes 1,022 Indian Asians) |          |       |                       |
|-----|-----------------|------------|---------------|---------|-------|------------------------------------------------------------------|----------|-------|-----------------------|--------------------------|----------|-------|-----------------------|------------------------------------------------------|----------|-------|-----------------------|--------------------------------------------------------|----------|-------|-----------------------|
|     |                 |            |               | Effect  | Other | n                                                                | Freq (%) | beta  | P                     | n                        | Freq (%) | beta  | P                     | N                                                    | Freq (%) | beta  | P                     | n                                                      | Freq (%) | beta  | P                     |
| 1   | <i>GRIK3</i>    | rs12739617 | 36,945,244    | G       | C     | 70,057                                                           | 87       | 0.031 | 1.2x10 <sup>-4</sup>  | 62,500                   | 89       | 0.036 | 4.2x10 <sup>-5</sup>  | 39,878                                               | 86       | 0.025 | 1.3x10 <sup>-3</sup>  | 30,179                                                 | 89       | 0.034 | 1.0x10 <sup>-2</sup>  |
| 2   | <i>IRS1</i>     | rs2943650  | 226,814,165   | C       | T     | 76,150                                                           | 36       | 0.034 | 3.8x10 <sup>-11</sup> | 68,593                   | 36       | 0.031 | 6.0x10 <sup>-9</sup>  | 43,798                                               | 36       | 0.044 | 2.9x10 <sup>-11</sup> | 32,352                                                 | 36       | 0.021 | 9.0x10 <sup>-3</sup>  |
| 2   | <i>SNED1</i>    | rs7425888  | 241,575,678   | A       | G     | 68,389                                                           | 14       | 0.025 | 8.9x10 <sup>-4</sup>  | 61,105                   | 13       | 0.019 | 1.9x10 <sup>-2</sup>  | 39,421                                               | 15       | 0.044 | 9.3x10 <sup>-6</sup>  | 28,968                                                 | 14       | 0.002 | 8.8x10 <sup>-1</sup>  |
| 5   | <i>HTR1A</i>    | rs7736910  | 63,076,529    | G       | A     | 57,036                                                           | 52       | 0.028 | 1.5x10 <sup>-6</sup>  | 51,682                   | 51       | 0.030 | 1.2x10 <sup>-6</sup>  | 32,212                                               | 55       | 0.021 | 6.0x10 <sup>-3</sup>  | 24,825                                                 | 50       | 0.034 | 1.2x10 <sup>-4</sup>  |
| 5   | <i>MARCH3</i>   | rs7738021  | 126,230,059   | G       | T     | 57,066                                                           | 66       | 0.015 | 1.7x10 <sup>-2</sup>  | 51,712                   | 67       | 0.014 | 3.2x10 <sup>-2</sup>  | 32,249                                               | 64       | 0.006 | 4.2x10 <sup>-1</sup>  | 24,818                                                 | 68       | 0.030 | 3.2x10 <sup>-3</sup>  |
| 6   | <i>WISP3</i>    | rs6909893  | 112,466,236   | A       | G     | 69,259                                                           | 26       | 0.033 | 8.7x10 <sup>-8</sup>  | 61,702                   | 27       | 0.031 | 9.5x10 <sup>-7</sup>  | 39,463                                               | 24       | 0.038 | 5.5x10 <sup>-6</sup>  | 29,796                                                 | 28       | 0.024 | 8.4x10 <sup>-3</sup>  |
| 8   | <i>PPP1R3B</i>  | rs17706711 | 9,116,692     | A       | T     | 63,453                                                           | 82       | 0.023 | 1.6x10 <sup>-3</sup>  | 61,677                   | 82       | 0.023 | 1.6x10 <sup>-3</sup>  | 33,790                                               | 83       | 0.024 | 2.1x10 <sup>-2</sup>  | 29,664                                                 | 82       | 0.019 | 7.9x10 <sup>-2</sup>  |
| 8   | <i>RIP1L1</i>   | rs9657518  | 10,504,999    | C       | T     | 69,114                                                           | 42       | 0.018 | 1.9x10 <sup>-3</sup>  | 61,830                   | 41       | 0.019 | 1.1x10 <sup>-3</sup>  | 39,267                                               | 46       | 0.017 | 2.1x10 <sup>-2</sup>  | 29,847                                                 | 37       | 0.016 | 8.5x10 <sup>-2</sup>  |
| 8   | <i>FDFT1</i>    | rs17149412 | 11,719,247    | C       | T     | 57,063                                                           | 30       | 0.018 | 5.3x10 <sup>-3</sup>  | 51,709                   | 30       | 0.019 | 4.2x10 <sup>-3</sup>  | 32,239                                               | 32       | 0.011 | 1.8x10 <sup>-1</sup>  | 24,824                                                 | 27       | 0.025 | 1.7x10 <sup>-2</sup>  |
| 8   | <i>SLC39A14</i> | rs12674913 | 22,319,562    | G       | C     | 68,327                                                           | 70       | 0.028 | 1.1x10 <sup>-6</sup>  | 60,770                   | 71       | 0.023 | 1.7x10 <sup>-4</sup>  | 37,581                                               | 69       | 0.030 | 6.5x10 <sup>-5</sup>  | 30,746                                                 | 72       | 0.026 | 3.5x10 <sup>-3</sup>  |
| 10  | <i>GFRA1</i>    | rs180585   | 117,797,907   | C       | T     | 71,008                                                           | 84       | 0.030 | 1.6x10 <sup>-5</sup>  | 63,451                   | 84       | 0.030 | 3.7x10 <sup>-5</sup>  | 40,300                                               | 84       | 0.017 | 7.0x10 <sup>-2</sup>  | 30,661                                                 | 84       | 0.046 | 2.0x10 <sup>-5</sup>  |
| 13  | <i>SPRY2</i>    | rs534870   | 79,857,208    | G       | A     | 70,831                                                           | 32       | 0.030 | 6.5x10 <sup>-8</sup>  | 63,273                   | 30       | 0.032 | 3.2x10 <sup>-8</sup>  | 40,263                                               | 32       | 0.032 | 1.1x10 <sup>-5</sup>  | 30,568                                                 | 31       | 0.026 | 2.2x10 <sup>-3</sup>  |
| 16  | <i>FTO</i>      | rs8050136  | 52,373,776    | A       | C     | 70,642                                                           | 40       | 0.055 | 2.7x10 <sup>-26</sup> | 63,085                   | 41       | 0.056 | 5.6x10 <sup>-25</sup> | 40,363                                               | 40       | 0.051 | 1.3x10 <sup>-13</sup> | 30,279                                                 | 40       | 0.058 | 1.1x10 <sup>-12</sup> |
| 18  | <i>MC4R</i>     | rs590215   | 56,055,068    | T       | C     | 70,397                                                           | 28       | 0.026 | 6.2x10 <sup>-6</sup>  | 62,840                   | 26       | 0.021 | 7.5x10 <sup>-4</sup>  | 39,996                                               | 27       | 0.040 | 3.2x10 <sup>-7</sup>  | 30,402                                                 | 28       | 0.011 | 2.4x10 <sup>-1</sup>  |

Body fat percentage was inverse normal transformed to approximate normality (mean = 0, sd = 1) in men and women separately. Alleles, effect is the fat % increasing allele, other is the fat % decreasing allele; beta, change in inverse normal transformed body fat percentage per effect allele; Chr/Position: the chromosome and position (in Build 36) of the SNP; Freq, frequency of the effect allele; Nearby Gene, gene nearest the SNP used in analyses

**Supplementary Table 4** Comparison of the combined stage 1 and stage 2 results for the rs2943650 SNP near *IRS1*, rs534870 SNP near *SPRY2*, and rs8050136 SNP in *FTO* in meta-analyses of ‘European individuals only’ vs. ‘Europeans and Indian-Asians combined’

| Locus                                                                     | Meta-analysis                  | N      | Freq (%) | beta   | P                     | I <sup>2</sup> |
|---------------------------------------------------------------------------|--------------------------------|--------|----------|--------|-----------------------|----------------|
| rs2943650 (near <i>IRS1</i> )<br>Chr2: 226,814,165 bp<br>Effect allele: T | All, European + Indian Asian   | 76,150 | 64       | -0.034 | 3.8x10 <sup>-11</sup> | 22%            |
|                                                                           | All, European                  | 68,593 | 64       | -0.031 | 6.0x10 <sup>-9</sup>  | 21%            |
|                                                                           | All, Indian Asian              | 7,557  | 71       | -0.065 | 2.7x10 <sup>-4</sup>  | 0%             |
|                                                                           | Men, European + Indian Asian   | 43,798 | 64       | -0.044 | 2.9x10 <sup>-11</sup> | 22%            |
|                                                                           | Men, European                  | 37,263 | 64       | -0.042 | 5.8x10 <sup>-9</sup>  | 21%            |
|                                                                           | Women, European + Indian Asian | 32,352 | 64       | -0.021 | 9.0x10 <sup>-3</sup>  | 8%             |
|                                                                           | Women, European                | 31,330 | 64       | -0.018 | 0.030                 | 1%             |
| rs534870 (near <i>SPRY2</i> )<br>Chr13: 79,857,208 bp<br>Effect allele: A | All, European + Indian Asian   | 70,831 | 68       | -0.030 | 6.5x10 <sup>-8</sup>  | 14%            |
|                                                                           | All, European                  | 63,273 | 70       | -0.032 | 3.2x10 <sup>-8</sup>  | 15%            |
|                                                                           | All, Indian Asian              | 7,557  | 58       | -0.011 | 0.52                  | 0%             |
|                                                                           | Men, European + Indian Asian   | 40,263 | 68       | -0.032 | 1.1x10 <sup>-5</sup>  | 23%            |
|                                                                           | Men, European                  | 33,727 | 70       | -0.041 | 3.6x10 <sup>-7</sup>  | 23%            |
|                                                                           | Women, European + Indian Asian | 30,568 | 69       | -0.026 | 0.0022                | 0%             |
|                                                                           | Women, European                | 29,546 | 69       | -0.024 | 0.0064                | 0%             |
| rs8050136 ( <i>FTO</i> )<br>Chr16: 52,373,776 bp<br>Effect allele: C      | All, European + Indian Asian   | 70,642 | 60       | -0.055 | 2.7x10 <sup>-26</sup> | 17%            |
|                                                                           | All, European                  | 63,085 | 59       | -0.056 | 5.6x10 <sup>-25</sup> | 17%            |
|                                                                           | All, Indian Asian              | 7,557  | 68       | -0.044 | 0.012                 | 0%             |
|                                                                           | Men, European + Indian Asian   | 40,363 | 60       | -0.051 | 1.3x10 <sup>-13</sup> | 29%            |
|                                                                           | Men, European                  | 33,828 | 59       | -0.050 | 1.9x10 <sup>-11</sup> | 29%            |
|                                                                           | Women, European + Indian Asian | 30,279 | 60       | -0.058 | 1.1x10 <sup>-12</sup> | 0%             |
|                                                                           | Women, European                | 29,257 | 60       | -0.057 | 2.9x10 <sup>-12</sup> | 9%             |

Indian-Asian individuals were only available for the stage 1 meta-analysis. Body fat percentage was inverse normal transformed to approximate normality (mean = 0, sd = 1) in men and women separately. The effect allele for each locus is the body fat percentage decreasing (major) allele. Chromosomal positions are indicated according to Build 36 and allele coding based on the positive strand.

beta, change in inverse normal transformed body fat percentage per effect allele in the combined stage 1 and stage 2 meta-analysis; bp, base pairs; Freq, frequency of the effect allele

**Supplementary Table 5** Association of the body fat percentage decreasing (T) allele of rs2943650 near *IRS1* with anthropometric traits in a meta-analysis of stage 2 follow-up studies

| Trait                                  | All individuals |                  |      | Men    |                  |       | Women  |                  |      | $P_{diff}$ |
|----------------------------------------|-----------------|------------------|------|--------|------------------|-------|--------|------------------|------|------------|
|                                        | n               | beta (se)        | P    | n      | beta (se)        | P     | n      | beta (se)        | P    |            |
| BMI, kg/m                              | 43,291          | -0.026 (0.026)   | 0.32 | 24,731 | -0.046 (0.032)   | 0.16  | 18,560 | 0.012 (0.045)    | 0.79 | 0.30       |
| Height, m                              | 43,205          | -0.018 (0.044)   | 0.68 | 24,692 | 0.014 (0.060)    | 0.82  | 18,513 | -0.055 (0.064)   | 0.39 | 0.43       |
| Weight, kg                             | 43,208          | -0.076 (0.085)   | 0.37 | 24,688 | -0.156 (0.113)   | 0.17  | 18,520 | 0.029 (0.129)    | 0.82 | 0.28       |
| Waist circumference, cm                | 21,850          | 0.063 (0.098)    | 0.52 | 10,609 | 0.062 (0.134)    | 0.65  | 11,241 | 0.065 (0.143)    | 0.65 | 0.99       |
| Hip circumference, cm                  | 21,834          | -0.040 (0.072)   | 0.58 | 10,604 | -0.026 (0.088)   | 0.76  | 11,230 | -0.068 (0.128)   | 0.59 | 0.77       |
| Waist-to-hip ratio                     | 21,832          | 0.0009 (0.0006)  | 0.13 | 10,602 | 0.0007 (0.0008)  | 0.40  | 11,230 | 0.0011 (0.0008)  | 0.19 | 0.72       |
|                                        | n               | OR (95% CI)      | P    | n      | OR (95% CI)      | P     | n      | OR (95% CI)      | P    | $P_{diff}$ |
| Obesity (BMI $\geq$ 30 vs. BMI <25)    | 26,009          | 0.98 (0.94-1.02) | 0.36 | 13,518 | 0.94 (0.89-1.00) | 0.044 | 12,491 | 1.03 (0.96-1.10) | 0.40 | 0.048      |
| Overweight (BMI $\geq$ 25 vs. BMI <25) | 42,551          | 1.01 (0.98-1.04) | 0.67 | 24,557 | 0.99 (0.95-1.03) | 0.56  | 17,994 | 1.03 (0.99-1.08) | 0.19 | 0.18       |

All models were adjusted for age and age squared. The meta-analyses on BMI, height, weight, obesity, and overweight included all 11 stage 2 cohorts whereas the meta-analyses on waist circumference, hip, circumference, and waist-to-hip ratio included three cohorts (EPIC-Norfolk, Fenland, and MRC Ely) (**Supplementary Note**). beta, change in phenotype per each fat percentage decreasing (T) allele of rs2943650;  $P_{diff}$ , P value for the difference between sexes

**Supplementary Table 6** Association of the body fat percentage decreasing (T) allele of rs2943650 near *IRS1* with blood lipids, insulin sensitivity traits, leptin and adiponectin in a meta-analysis of stage 2 and stage 3 follow-up studies.

| Trait                    | All individuals |                |                      | Men    |                |                      | Women  |                |          | <i>P<sub>diff</sub></i> |
|--------------------------|-----------------|----------------|----------------------|--------|----------------|----------------------|--------|----------------|----------|-------------------------|
|                          | n               | beta (se)      | <i>P</i>             | n      | beta (se)      | <i>P</i>             | n      | beta (se)      | <i>P</i> |                         |
| HDL cholesterol          | 20,596          | -0.054 (0.010) | 1.0x10 <sup>-7</sup> | 9,937  | -0.077 (0.015) | 1.7x10 <sup>-7</sup> | 10,659 | -0.033 (0.014) | 0.019    | 0.027                   |
| LDL cholesterol          | 20,596          | 0.020 (0.010)  | 0.045                | 9,937  | 0.031 (0.015)  | 0.033                | 10,659 | 0.010 (0.013)  | 0.44     | 0.26                    |
| Triglycerides            | 21,168          | 0.042 (0.010)  | 2.0x10 <sup>-5</sup> | 10,320 | 0.066 (0.014)  | 5.8x10 <sup>-6</sup> | 10,848 | 0.022 (0.013)  | 0.11     | 0.025                   |
| M/I-ratio                | 1,953           | -0.032 (0.031) | 0.30                 | 1,410  | -0.035 (0.037) | 0.34                 | 543    | -0.025 (0.058) | 0.67     | 0.88                    |
| Ins-AUC / Glu-AUC        | 9,572           | 0.047 (0.015)  | 0.0014               | 8,376  | 0.051 (0.016)  | 0.0011               | 1,196  | 0.017 (0.042)  | 0.69     | 0.45                    |
| Matsuda index            | 13,520          | -0.036 (0.012) | 0.0043               | 11,333 | -0.035 (0.014) | 0.010                | 2,187  | -0.037 (0.030) | 0.22     | 0.95                    |
| Gutt index               | 13,815          | -0.033 (0.012) | 0.0083               | 11,472 | -0.033 (0.014) | 0.015                | 2,343  | -0.029 (0.028) | 0.31     | 0.89                    |
| Leptin <sup>a</sup>      | 4,641           | -0.027 (0.021) | 0.21                 | 3,530  | -0.027 (0.024) | 0.26                 | 1,111  | -0.026 (0.044) | 0.55     | 0.98                    |
| Adiponectin <sup>b</sup> | 9,769           | -0.061 (0.015) | 4.7x10 <sup>-5</sup> | 8,681  | -0.072 (0.016) | 6.1x10 <sup>-6</sup> | 1,088  | 0.024 (0.044)  | 0.58     | 0.040                   |

All traits were inverse normal transformed to approximate normality (mean = 0, sd = 1) in men and women separately. All models were adjusted for age and age squared. The meta-analyses on blood lipids included three cohorts (EPIC-Norfolk, Fenland, and MRC Ely). The meta-analyses on Matsuda index and Gutt index included five cohorts (METSIM, MRC Ely, RISC, ULSAM, and Whitehall) of which all but Whitehall II had also data available on Ins-AUC / Glu-AUC. The M/I-ratios were available only from the RISC and ULSAM cohorts. The meta-analysis on adiponectin levels included four cohorts (METSIM, MRC Ely, MrOS, and RISC), of which all but METSIM had also data on leptin (**Supplementary Note**). Beta, change in phenotype per each body fat percentage decreasing (T) allele of rs2943650; M/I-ratio, glucose infused (M) derived by the circulating insulin concentration (I); Ins-AUC / Glu-AUC, insulin area under the curve / glucose area under the curve; *P<sub>diff</sub>*, *P* value for the difference between sexes. <sup>a</sup> Analyses for leptin had smaller sample size and thus statistical power than analyses for adiponectin. Assuming the beta-coefficient in the meta-analysis of all individuals represents the true effect size, a sample of more than 11,000 individuals would be needed to show a significant association (*P* < 0.05) between rs2943650 and leptin. <sup>b</sup> As the adiponectin sample consists mainly (89%) of men, the analysis in women is underpowered. Nevertheless, the beta-coefficient in women is different than in men and does not suggest any association between the near-*IRS1* locus and adiponectin.



**Supplementary Table 7** Significant associations ( $P < 0.05$ )\* of the rs2943650 SNP near *IRS1* and the rs534870 SNP near *SPRY2* with *cis* gene expression (*cis*-eQTLs) in subcutaneous adipose tissue, omental adipose tissue, blood, liver, and brain from three populations<sup>a, b, c</sup>

| SNP                    | Tissue           | Sample                          | Gene                            | n                  | Effect <sup>d</sup> | P*                    | P <sub>adj</sub> <sup>e</sup> | Peak SNP <sup>f</sup> | r <sup>2g</sup> | P                     | P <sub>adj</sub> <sup>h</sup> |                       |
|------------------------|------------------|---------------------------------|---------------------------------|--------------------|---------------------|-----------------------|-------------------------------|-----------------------|-----------------|-----------------------|-------------------------------|-----------------------|
| <b>All individuals</b> |                  |                                 |                                 |                    |                     |                       |                               |                       |                 |                       |                               |                       |
| rs2943650              | Subcutaneous fat | Surgery patients <sup>a</sup>   | <i>IRS1</i>                     | 590                | -                   | 4.2x10 <sup>-4</sup>  | 0.93                          | rs2943653             | 0.81            | 6.3x10 <sup>-6</sup>  | 0.37                          |                       |
|                        |                  |                                 | <i>BC018684</i>                 | 607                | +                   | 0.0017                | NA                            | NA                    | NA              | NA                    | NA                            |                       |
|                        |                  |                                 | <i>Contig24493_RC</i>           | 605                | -                   | 4.9x10 <sup>-4</sup>  | 0.98                          | rs2943653             | 0.81            | 5.3x10 <sup>-5</sup>  | 0.64                          |                       |
|                        |                  |                                 | <i>Contig50189_RC</i>           | 600                | -                   | 0.0098                | NA                            | NA                    | NA              | NA                    | NA                            |                       |
|                        |                  |                                 | <i>ENST00000272907</i>          | 609                | +                   | 0.032                 | NA                            | NA                    | NA              | NA                    | NA                            |                       |
|                        | Subcutaneous fat | General population <sup>b</sup> | <i>IRS1</i>                     | 604                | -                   | 9.6x10 <sup>-10</sup> | 0.63                          | rs2176040             | 1.00            | 9.6x10 <sup>-10</sup> | 0.62                          |                       |
|                        |                  |                                 | <i>Contig 50189_RC</i>          | 604                | -                   | 7.1x10 <sup>-5</sup>  | 0.72                          | rs2943653             | 0.79            | 3.7x10 <sup>-5</sup>  | 0.25                          |                       |
|                        | Omental fat      | Surgery patients <sup>a</sup>   | <i>IRS1</i>                     | 714                | -                   | 2.3x10 <sup>-8</sup>  | 0.97                          | rs908252              | 0.89            | 3.0x10 <sup>-9</sup>  | 0.74                          |                       |
|                        |                  |                                 | <i>Contig24493_RC</i>           | 738                | -                   | 2.6x10 <sup>-4</sup>  | 0.85                          | rs10933137            | 0.66            | 5.9x10 <sup>-5</sup>  | 0.51                          |                       |
|                        |                  |                                 | <i>Contig39389_RC</i>           | 739                | -                   | 0.024                 | NA                            | NA                    | NA              | NA                    | NA                            |                       |
|                        |                  |                                 | <i>Contig50189_RC</i>           | 735                | -                   | 0.013                 | 0.0087                        | rs3769647             | 0.00            | 1.6x10 <sup>-5</sup>  | 1.1x10 <sup>-5</sup>          |                       |
|                        | Blood            | General population <sup>b</sup> | <i>ENST00000272907</i>          | 740                | -                   | 0.0080                | NA                            | NA                    | NA              | NA                    | NA                            |                       |
|                        |                  |                                 | <i>COL4A4</i>                   | 745                | -                   | 0.03                  | 0.16                          | rs13398103            | 0.00            | 5.4x10 <sup>-30</sup> | 3.2 x10 <sup>-29</sup>        |                       |
|                        | rs534870         | Blood                           | General population <sup>b</sup> | <i>SPRY2</i>       | 745                 | -                     | 3.7x10 <sup>-4</sup>          | 7.9x10 <sup>-4</sup>  | rs7995973       | 0.00                  | 4.2x10 <sup>-14</sup>         | 9.1x10 <sup>-14</sup> |
|                        | <b>Men</b>       |                                 |                                 |                    |                     |                       |                               |                       |                 |                       |                               |                       |
| rs2943650              | Subcutaneous fat | Surgery patients <sup>a</sup>   | <i>IRS1</i>                     | 171                | -                   | 0.017                 | 0.52                          | rs2943653             | 0.82            | 5.7x10 <sup>-5</sup>  | 0.20                          |                       |
|                        |                  |                                 | <i>Contig24493_RC</i>           | 175                | -                   | 0.010                 | 0.49                          | rs2943653             | 0.82            | 0.0012                | 0.37                          |                       |
|                        |                  |                                 | <i>Contig50189_RC</i>           | 174                | -                   | 0.0095                | NA                            | NA                    | NA              | NA                    | NA                            |                       |
|                        | Subcutaneous fat | General population <sup>b</sup> | <i>IRS1</i>                     | 252                | -                   | 2.2x10 <sup>-8</sup>  | 0.61                          | rs2943645             | 0.97            | 2.1x10 <sup>-8</sup>  | 0.59                          |                       |
|                        |                  |                                 | <i>Contig 50189_RC</i>          | 252                | -                   | 0.0091                | 0.0084                        | rs11694119            | 0.01            | 2.9x10 <sup>-4</sup>  | 2.7x10 <sup>-4</sup>          |                       |
|                        | Omental fat      | Surgery patients <sup>a</sup>   | <i>IRS1</i>                     | 188                | -                   | 9.7x10 <sup>-4</sup>  | 0.92                          | rs908252              | 0.85            | 4.5x10 <sup>-5</sup>  | 0.60                          |                       |
|                        |                  |                                 | <i>COL4A4</i>                   | 192                | -                   | 0.014                 | 0.066                         | rs6706802             | 0.02            | 3.5x10 <sup>-6</sup>  | 2.1x10 <sup>-5</sup>          |                       |
|                        |                  |                                 | <i>Contig39389_RC</i>           | 192                | -                   | 0.0070                | NA                            | NA                    | NA              | NA                    | NA                            |                       |
|                        | rs534870         | Omental fat                     | Surgery patients <sup>a</sup>   | <i>HSS00006179</i> | 193                 | +                     | 8.6x10 <sup>-4</sup>          | NA                    | NA              | NA                    | NA                            | NA                    |
| <i>XM_090673</i>       |                  |                                 |                                 | 192                | +                   | 0.035                 | NA                            | NA                    | NA              | NA                    | NA                            |                       |
|                        | Blood            | General population <sup>b</sup> | <i>ARF4</i>                     | 312                | -                   | 0.022                 | 0.031                         | rs12583018            | 0.01            | 0.002                 | 0.0028                        |                       |
| <b>Women</b>           |                  |                                 |                                 |                    |                     |                       |                               |                       |                 |                       |                               |                       |
| rs2943650              | Subcutaneous fat | Surgery patients <sup>a</sup>   | <i>IRS1</i>                     | 416                | -                   | 0.017                 | 0.91                          | rs2943653             | 0.80            | 0.011                 | 0.73                          |                       |
|                        |                  |                                 | <i>BC018684</i>                 | 430                | +                   | 0.011                 | NA                            | NA                    | NA              | NA                    | NA                            |                       |
|                        |                  |                                 | <i>Contig24493_RC</i>           | 427                | -                   | 0.015                 | 0.89                          | rs2943653             | 0.80            | 0.0088                | 0.76                          |                       |
|                        | Subcutaneous fat | General population <sup>b</sup> | <i>IRS1</i>                     | 352                | -                   | 2.7x10 <sup>-4</sup>  | 0.0010                        | rs1190117             | 0.01            | 1.1x10 <sup>-4</sup>  | 4.4x10 <sup>-4</sup>          |                       |
|                        |                  |                                 | <i>Contig50189_RC</i>           | 352                | -                   | 0.0019                | 0.88                          | rs2138157             | 0.89            | 0.0019                | 0.87                          |                       |
|                        | Omental fat      | Surgery patients <sup>a</sup>   | <i>Contig24493_RC</i>           | 543                | +                   | 0.0024                | 0.73                          | rs10933137            | 0.69            | 7.3x10 <sup>-4</sup>  | 0.57                          |                       |
|                        |                  |                                 | <i>Contig50189_RC</i>           | 539                | -                   | 0.037                 | 0.45                          | rs3769647             | 0.00            | 3.0x10 <sup>-4</sup>  | 3.7x10 <sup>-4</sup>          |                       |
|                        |                  |                                 | <i>ENST00000272907</i>          | 545                | -                   | 0.0094                | NA                            | NA                    | NA              | NA                    | NA                            |                       |
|                        | Liver            | Surgery patients <sup>a</sup>   | <i>HSS00339567</i>              | 405                | +                   | 0.045                 | NA                            | NA                    | NA              | NA                    | NA                            |                       |
|                        | Blood            | General population <sup>b</sup> | <i>SPRY2</i>                    | 433                | -                   | 0.0012                | 0.0083                        | rs518627              | 0.01            | 1.0x10 <sup>-9</sup>  | 7.3x10 <sup>-9</sup>          |                       |

The gene transcripts that were tested for rs2943650 were BC014369, BC018685, BC035052, Contig24493\_RC, Contig39389\_RC, Contig50189\_RC, ENST00000272907, hCT1970673, HSS00207461, HSS00339567, *COL4A3* (NM\_000091 and NM\_031362), *COL4A4* (NM\_000092), *IRS1* (NM\_005544), and *RHBDD1* (NM\_032276).

The gene transcripts that were tested for the rs534870 SNP were AB032991, BC036310, BC039360, HSS00006179, HSS00020342, HSS00085876, HSS00097095, HSS00303580, *SPRY2* (NM\_005842), *RBM26* (HM\_022118), and XM\_090673. NA, data not reported as the body fat percentage associated SNP and the most significant SNP for the gene transcript were the same.

\*Only associations with  $P$  value  $< 0.05$  with gene expression are reported. As altogether 26 genes were tested in the gene expression analyses, the threshold for a statistically significant association with Bonferroni correction is  $P=0.0019$ ; <sup>a</sup> Tissue samples from patients who underwent bariatric surgery (see Supplementary Note - Methods); <sup>b</sup> Tissue samples from general population (see Supplementary Note - Methods); <sup>c</sup> Neutopathologically normal cortical brain samples from 193 individuals (mean age 81 years) of European descent (see Supplementary Note - Methods). No significant associations with brain expression were found. <sup>d</sup> Direction of effect for the body fat percentage decreasing allele; <sup>e</sup>  $P$  value for the body fat percentage SNP after conditioning on the most significant SNP for the gene transcript; <sup>f</sup> Most significant SNP associated; <sup>g</sup> Correlation between the body fat percentage SNP and the peak SNP with the gene transcript; <sup>h</sup>  $P$  value for the peak SNP after conditioning on the body fat percentage SNP.

**Supplementary Table 8** Association of the body fat percentage decreasing (A) allele of rs534870 near *SPRY2* with anthropometric traits, blood lipids, and insulin sensitivity traits in a meta-analysis of stage 2 follow-up studies.

| Trait                            | All individuals |                  |        | Men    |                  |        | Women  |                  |        | $P_{diff}$ |
|----------------------------------|-----------------|------------------|--------|--------|------------------|--------|--------|------------------|--------|------------|
|                                  | n               | beta (se)        | P      | n      | beta (se)        | P      | n      | beta (se)        | P      |            |
| BMI, kg/m <sup>2</sup>           | 43,132          | -0.087 (0.027)   | 0.0014 | 24,694 | -0.073 (0.034)   | 0.031  | 18,438 | -0.114(0.046)    | 0.014  | 0.47       |
| Height, m                        | 43,047          | -0.034 (0.046)   | 0.46   | 24,656 | 0.083 (0.062)    | 0.18   | 18,391 | -0.169 (0.067)   | 0.012  | 0.0060     |
| Weight, kg                       | 43,049          | -0.284 (0.089)   | 0.0014 | 24,652 | -0.138 (0.118)   | 0.24   | 18,397 | -0.473 (0.134)   | 0.043  | 0.060      |
| Waist circumference, cm          | 21,607          | -0.119 (0.102)   | 0.24   | 10,516 | -0.078 (0.139)   | 0.57   | 11,091 | -0.167 (0.150)   | 0.26   | 0.66       |
| Hip circumference, cm            | 21,591          | -0.070 (0.074)   | 0.35   | 10,510 | 0.025 (0.092)    | 0.78   | 11,081 | -0.259 (0.129)   | 0.045  | 0.031      |
| Waist-to-hip ratio               | 20,431          | -0.0003 (0.0006) | 0.62   | 10,602 | -0.0011 (0.0009) | 0.20   | 9,829  | 0.0005 (0.0009)  | 0.55   | 0.18       |
| HDL cholesterol                  | 20,351          | 0.010 (0.011)    | 0.36   | 9,847  | -0.006 (0.015)   | 0.69   | 10,504 | 0.025 (0.015)    | 0.10   | 0.15       |
| LDL cholesterol                  | 20,351          | 0.005 (0.010)    | 0.62   | 9,847  | 0.000 (0.015)    | 0.99   | 10,504 | 0.009 (0.014)    | 0.50   | 0.65       |
| Triglycerides                    | 20,897          | -0.014 (0.010)   | 0.16   | 10,311 | -0.000 (0.015)   | 0.97   | 10,803 | -0.026 (0.014)   | 0.060  | 0.21       |
| M/I-ratio                        | 1,974           | 0.052 (0.034)    | 0.13   | 1,410  | 0.069 (0.041)    | 0.094  | 564    | 0.015 (0.060)    | 0.81   | 0.46       |
| Ins-AUC / Glu-AUC                | 9,454           | -0.010 (0.016)   | 0.54   | 8,308  | -0.000 (0.017)   | 0.98   | 1,146  | -0.072 (0.044)   | 0.10   | 0.13       |
| Matsuda index                    | 11,379          | 0.013 (0.014)    | 0.33   | 9,777  | 0.003 (0.015)    | 0.82   | 1,612  | 0.100 (0.037)    | 0.0062 | 0.014      |
| Gutt index                       | 11,569          | 0.032 (0.014)    | 0.032  | 9,917  | 0.021 (0.015)    | 0.18   | 1,754  | 0.089 (0.035)    | 0.011  | 0.072      |
|                                  | n               | OR (95% CI)      | P      | n      | OR (95% CI)      | P      | n      | OR (95% CI)      | P      | $P_{diff}$ |
| Obesity (BMI ≥30 vs. BMI <25)    | 25,940          | 0.93 (0.89-0.97) | 0.0010 | 13,521 | 0.92 (0.87-0.98) | 0.0095 | 12,419 | 0.93 (0.87-1.00) | 0.041  | 0.79       |
| Overweight (BMI ≥25 vs. BMI <25) | 42,371          | 0.98 (0.95-1.01) | 0.16   | 24,520 | 0.99 (0.95-1.03) | 0.61   | 17,851 | 0.96 (0.92-1.01) | 0.12   | 0.42       |

Anthropometric traits were non-transformed, whereas blood lipid and insulin sensitivity traits were inverse normal transformed to approximate normality (mean = 0, sd = 1) in men and women separately. All models were adjusted for age and age squared. The meta-analyses on BMI, height, weight, obesity, and overweight included all 11 stage 2 studies whereas the meta-analyses on waist circumference, hip, circumference, waist-to-hip ratio, and blood lipids included three studies (EPIC-Norfolk, Fenland, and MRC Ely) (**Supplementary Note**). The meta-analyses on Matsuda index and Gutt index included five cohorts (METSIM, MRC Ely, RISC, ULSAM, and Whitehall) of which all but Whitehall II had also data available on Ins-AUC / Glu-AUC. The M/I-ratios were available only from the RISC and ULSAM cohorts. beta, change in phenotype per each body fat percentage decreasing (A) allele of rs534870; M/I-ratio, glucose infused (M) derived by the circulating insulin concentration (I); Ins-AUC / Glu-AUC, insulin area under the curve / glucose area under the curve;  $P_{diff}$ , P value for the difference between sexes

**Supplementary Table 9** Association of established susceptibility loci for BMI, waist circumference, extreme obesity, and waist-to-hip ratio with body fat percentage in the stage 1 genome-wide association meta-analysis

| Chr | Nearest gene     | SNP        | Effect allele | Other allele | N      | Freq (%) | $\beta$ | P                     | Established trait | Original reference |
|-----|------------------|------------|---------------|--------------|--------|----------|---------|-----------------------|-------------------|--------------------|
| 1   | <i>TNNI3K</i>    | rs1514175  | A             | G            | 36,563 | 44       | 0.009   | $2.4 \times 10^{-1}$  | BMI               | 8                  |
| 1   | <i>PTBP2</i>     | rs10489741 | A             | G            | 36,568 | 57       | 0.020   | $7.8 \times 10^{-3}$  | BMI               | 8                  |
| 1   | <i>NEGR1</i>     | rs2815752  | A             | G            | 36,602 | 62       | 0.022   | $4.3 \times 10^{-3}$  | BMI               | 6,7                |
| 1   | <i>SEC16B</i>    | rs10913469 | C             | T            | 36,580 | 19       | 0.030   | $1.5 \times 10^{-3}$  | BMI               | 6                  |
| 2   | <i>LRP1B</i>     | rs2890652  | C             | T            | 29,035 | 18       | 0.001   | $9.4 \times 10^{-1}$  | BMI               | 8                  |
| 2   | <i>FANCL</i>     | rs887912   | T             | C            | 29,049 | 29       | 0.019   | $3.4 \times 10^{-2}$  | BMI               | 8                  |
| 2   | <i>RBJ</i>       | rs713586   | C             | T            | 36,542 | 47       | 0.015   | $4.7 \times 10^{-2}$  | BMI               | 8                  |
| 2   | <i>TMEM18</i>    | rs7561317  | G             | A            | 36,351 | 66       | 0.032   | $9.3 \times 10^{-4}$  | BMI               | 6,7                |
| 3   | <i>CADM2</i>     | rs13078807 | G             | A            | 27,275 | 20       | 0.018   | $7.8 \times 10^{-2}$  | BMI               | 8                  |
| 3   | <i>ETV5</i>      | rs7647305  | C             | T            | 36,546 | 79       | 0.013   | $1.5 \times 10^{-1}$  | BMI               | 6                  |
| 4   | <i>SLC39A8</i>   | rs13107325 | T             | C            | 27,275 | 8        | 0.027   | $1.2 \times 10^{-1}$  | BMI               | 8                  |
| 4   | <i>GNPDA2</i>    | rs10938397 | G             | A            | 36,610 | 43       | 0.026   | $1.2 \times 10^{-3}$  | BMI               | 7                  |
| 5   | <i>ZNF608</i>    | rs4836133  | A             | C            | 27,274 | 47       | 0.032   | $2.4 \times 10^{-4}$  | BMI               | 8                  |
| 5   | <i>FLJ35779</i>  | rs2112347  | T             | G            | 36,600 | 59       | 0.003   | $6.9 \times 10^{-1}$  | BMI               | 8                  |
| 6   | <i>NUDT3</i>     | rs206936   | G             | A            | 36,620 | 24       | 0.010   | $2.7 \times 10^{-1}$  | BMI               | 8                  |
| 6   | <i>TFAP2B</i>    | rs987237   | G             | A            | 36,614 | 18       | 0.025   | $8.2 \times 10^{-3}$  | BMI               | 8                  |
| 9   | <i>LRRN6C</i>    | rs10968576 | G             | A            | 36,618 | 29       | 0.015   | $7.4 \times 10^{-2}$  | BMI               | 8                  |
| 11  | <i>RPL27A</i>    | rs4929949  | C             | T            | 32,629 | 50       | 0.007   | $3.7 \times 10^{-1}$  | BMI               | 8                  |
| 11  | <i>MTCH2</i>     | rs10838738 | G             | A            | 36,587 | 34       | 0.017   | $3.0 \times 10^{-2}$  | BMI               | 7                  |
| 11  | <i>BDNF</i>      | rs4923461  | A             | G            | 36,599 | 77       | 0.023   | $6.4 \times 10^{-3}$  | BMI               | 6                  |
| 12  | <i>FAIM2</i>     | rs7138803  | A             | G            | 36,572 | 37       | 0.025   | $1.0 \times 10^{-3}$  | BMI               | 6                  |
| 13  | <i>MTIF3</i>     | rs4771122  | G             | A            | 34,832 | 22       | 0.011   | $2.3 \times 10^{-1}$  | BMI               | 8                  |
| 14  | <i>PRKD1</i>     | rs11847697 | T             | C            | 27,872 | 5        | 0.061   | $5.2 \times 10^{-3}$  | BMI               | 8                  |
| 14  | <i>NRXN3</i>     | rs10146997 | G             | A            | 29,012 | 20       | 0.003   | $8.1 \times 10^{-1}$  | BMI               | 8                  |
| 15  | <i>MAP2K5</i>    | rs2241423  | G             | A            | 29,064 | 78       | 0.013   | $2.0 \times 10^{-1}$  | BMI               | 8                  |
| 16  | <i>GPRC5B</i>    | rs12444979 | C             | T            | 29,021 | 87       | 0.016   | $2.0 \times 10^{-1}$  | BMI               | 8                  |
| 16  | <i>SH2B1</i>     | rs7498665  | G             | A            | 36,598 | 36       | 0.029   | $2.3 \times 10^{-4}$  | BMI               | 6,7                |
| 16  | <i>FTO</i>       | rs8050136  | A             | C            | 36,537 | 39       | 0.063   | $3.9 \times 10^{-17}$ | BMI               | 3,5                |
| 18  | <i>MC4R</i>      | rs17782313 | C             | T            | 35,798 | 28       | 0.039   | $2.1 \times 10^{-6}$  | BMI               | 4                  |
| 19  | <i>TMEM160</i>   | rs3810291  | A             | G            | 34,832 | 62       | 0.001   | $9.4 \times 10^{-1}$  | BMI               | 8                  |
| 19  | <i>QPCTL</i>     | rs2287019  | C             | T            | 22,188 | 82       | 0.036   | $5.0 \times 10^{-3}$  | BMI               | 8                  |
| 19  | <i>KCTD15</i>    | rs29941    | G             | A            | 34,408 | 66       | 0.013   | $1.0 \times 10^{-1}$  | BMI               | 6,7                |
| 6   | <i>TFAP2B</i>    | rs987237   | G             | A            | 36,613 | 18       | 0.025   | $8.2 \times 10^{-3}$  | Waist             | 26                 |
| 8   | <i>MSRA</i>      | rs7826222  | G             | C            | 18,566 | 23       | 0.012   | $3.8 \times 10^{-1}$  | Waist             | 26                 |
| 14  | <i>NRXN3</i>     | rs10146997 | G             | A            | 29012  | 20       | 0.003   | $8.1 \times 10^{-1}$  | Waist             | 25                 |
| 1   | <i>SDCCAG8</i>   | rs12145833 | T             | G            | 36,342 | 84       | 0.014   | $1.7 \times 10^{-1}$  | Extreme obesity   | 28                 |
| 8   | <i>TNKS/MSRA</i> | rs473034   | T             | C            | 34,832 | 11       | 0.012   | $4.5 \times 10^{-2}$  | Extreme obesity   | 28                 |
| 10  | <i>PTER</i>      | rs10508503 | C             | T            | 26,034 | 91       | 0.018   | $3.1 \times 10^{-1}$  | Extreme obesity   | 27                 |
| 16  | <i>MAF</i>       | rs1424233  | T             | C            | 36,309 | 52       | 0.005   | $4.8 \times 10^{-1}$  | Extreme obesity   | 27                 |
| 18  | <i>NPC1</i>      | rs1805081  | T             | C            | 33,460 | 60       | 0.016   | $4.5 \times 10^{-2}$  | Extreme obesity   | 27                 |
| 1   | <i>TBX15</i>     | rs984222   | G             | C            | 36,596 | 58       | -0.006  | $4.2 \times 10^{-1}$  | WHR adj BMI       | 29                 |
| 1   | <i>LYPLAL1</i>   | rs4846567  | G             | T            | 36,591 | 73       | -0.024  | $4.4 \times 10^{-3}$  | WHR adj BMI       | 26,29              |
| 1   | <i>DNM3</i>      | rs1011731  | G             | A            | 36,522 | 43       | -0.005  | $5.1 \times 10^{-1}$  | WHR adj BMI       | 29                 |
| 2   | <i>GRB14</i>     | rs10195252 | T             | C            | 34,832 | 60       | -0.025  | $1.3 \times 10^{-3}$  | WHR adj BMI       | 29                 |
| 3   | <i>ADAMTS9</i>   | rs6795735  | C             | T            | 36,603 | 51       | -0.011  | $1.4 \times 10^{-1}$  | WHR adj BMI       | 29                 |
| 3   | <i>NISCH</i>     | rs6784615  | T             | C            | 34,291 | 94       | 0.003   | $8.5 \times 10^{-1}$  | WHR adj BMI       | 29                 |
| 5   | <i>CPEB4</i>     | rs6861681  | A             | G            | 32,628 | 29       | -0.012  | $1.8 \times 10^{-1}$  | WHR adj BMI       | 29                 |
| 6   | <i>RSPO3</i>     | rs9491696  | G             | C            | 36,564 | 49       | -0.009  | $2.1 \times 10^{-1}$  | WHR adj BMI       | 29                 |
| 6   | <i>VEGFA</i>     | rs6905288  | A             | G            | 36,332 | 59       | 0.000   | $9.8 \times 10^{-1}$  | WHR adj BMI       | 29                 |
| 6   | <i>LY86</i>      | rs1294421  | G             | T            | 36,604 | 58       | -0.005  | $5.5 \times 10^{-1}$  | WHR adj BMI       | 29                 |
| 7   | <i>NFE2L3</i>    | rs1055144  | T             | C            | 36,548 | 24       | -0.013  | $1.4 \times 10^{-1}$  | WHR adj BMI       | 29                 |
| 12  | <i>ITPR2</i>     | rs718314   | G             | A            | 36,339 | 24       | -0.011  | $2.0 \times 10^{-1}$  | WHR adj BMI       | 29                 |
| 12  | <i>HOXC13</i>    | rs1443512  | A             | C            | 35,670 | 25       | 0.006   | $5.1 \times 10^{-1}$  | WHR adj BMI       | 29                 |
| 22  | <i>KREMEN1</i>   | rs4823006  | A             | G            | 36,475 | 54       | -0.011  | $1.3 \times 10^{-1}$  | WHR adj BMI       | 29                 |

Effect allele is the BMI, waist circumference, extreme obesity risk, or waist-to-hip ratio increasing allele. Chr, chromosome; Freq, frequency of the effect allele; WHR adj BMI, waist-to-hip ratio adjusted for BMI

## 1.2. SUPPLEMENTARY FIGURES

- Supplementary Figure 1** Study design and participating cohorts.
- Supplementary Figure 2** Manhattan plots showing the significance of association with body fat percentage for all SNPs in the stage 1 meta-analysis in all individuals (n=36,626), individuals of European descent (n=29,069), men (n=19,815), and women (n=16,811).
- Supplementary Figure 3** Association of the rs2943650 SNP (near-*IRS1*) body fat percentage decreasing (T) allele with body fat percentage and insulin sensitivity (measured with the Matsuda index) among 6,489 men from the METSIM (Metabolic Syndrome in Men) study with and without adjustment of each trait with the other.
- Supplementary Figure 4** Association of SNPs within  $\pm 1$  Mb from the rs2943650 SNP and  $\pm 1$  Mb from the rs534870 SNP with the expression of *IRS1* and *SPRY2*, respectively, in omental and subcutaneous adipose tissue.
- Supplementary Figure 5** Expression of the *IRS1* gene in isolated adipocytes from visceral and subcutaneous adipose tissues of male and female mice.
- Supplementary Figure 6** Expression of the *IRS1* gene in visceral and subcutaneous adipose tissues of men and women.
- Supplementary Figure 7** Quantile-quantile plots and genomic control parameters ( $\lambda$ ) for the association with body fat percentage in all individuals (n=36,626), individuals of European descent (n=29,069), men (n=19,815), and women (n=16,811).

| <b>STAGE 1</b><br><b>GWA meta-analysis of body fat percentage</b>                                                                                                                                                                                                              | <b>STAGE 2</b><br><b>Follow-up of body fat percentage for the 14 most significant loci</b>                                                                                                                                                                                                                                                                                                      | <b>STAGE 3</b><br><b>Follow-up of near <i>IRS1</i> and near <i>SPRY2</i> loci for secondary traits</b>                                                                                                                                                                                                                                                                                                                                                                                                                                                                                                                                                                                                                                                                                                                                                                                                                                                                                                                        |
|--------------------------------------------------------------------------------------------------------------------------------------------------------------------------------------------------------------------------------------------------------------------------------|-------------------------------------------------------------------------------------------------------------------------------------------------------------------------------------------------------------------------------------------------------------------------------------------------------------------------------------------------------------------------------------------------|-------------------------------------------------------------------------------------------------------------------------------------------------------------------------------------------------------------------------------------------------------------------------------------------------------------------------------------------------------------------------------------------------------------------------------------------------------------------------------------------------------------------------------------------------------------------------------------------------------------------------------------------------------------------------------------------------------------------------------------------------------------------------------------------------------------------------------------------------------------------------------------------------------------------------------------------------------------------------------------------------------------------------------|
| <p><b>Meta-analysis of 2.5M SNPs with body fat percentage (<math>n_{\max}=36,626</math>)</b></p> <p>AGES<br/>Amish<br/>CHS<br/>CoLaus<br/>EPIC-Norfolk<br/>ERF<br/>FamHS<br/>Fenland<br/>Framingham<br/>GOOD<br/>KORA S3<br/>KORA S4<br/>Lolipop<br/>Rotterdam<br/>TwinsUK</p> | <p><b>Meta-analysis of 14 SNPs with body fat percentage, BMI, height, weight, risk of obesity, and risk of overweight (<math>n_{\max}=34,556</math>)</b></p> <p>BPPP<br/>deCODE<br/>EPIC-Norfolk (excluding stage 1 samples)<br/>Fenland (excluding stage 1 samples)<br/>GenMets<br/>METSIM<br/>MRC Ely<br/>MrOS Sweden<br/>ORCADES<br/>TwinsUK (excluding stage 1 samples)<br/>VIS-CROATIA</p> | <p><b>Gene expression analyses in adipose tissue and whole blood (<math>n_{\max}=745</math>)</b></p> <p><b>Analyses of waist and hip circumferences, waist-to-hip ratio, blood lipids (<math>n_{\max}=21,850</math>)</b></p> <p>EPIC-Norfolk (excluding stage 1 samples)<br/>Fenland (excluding stage 1 samples)<br/>MRC Ely</p> <p><b>Analyses of insulin sensitivity traits (<math>n_{\max}=13,815</math>)</b></p> <p>METSIM<br/>MRC Ely<br/>RISC<br/>ULSAM<br/>Whitehall II</p> <p><b>Additional samples of body fat percentage for near-<i>IRS1</i> (<math>n=5,196</math>)</b></p> <p>RISC<br/>Whitehall II</p> <p><b>Analyses of visceral fat and subcutaneous fat for near-<i>IRS1</i> (<math>n=10,556</math>)</b></p> <p>GWA meta-analysis on fat distribution</p> <p><b>Adiponectin analyses for near-<i>IRS1</i> (<math>n=9,769</math>)</b></p> <p>METSIM<br/>MRC Ely<br/>MrOS Sweden<br/>RISC</p> <p><b>Leptin analyses for near-<i>IRS1</i> (<math>n=4,641</math>)</b></p> <p>MRC Ely<br/>MrOS Sweden<br/>RISC</p> |

**Supplementary Figure 1** Study design and participating cohorts. Stage 1 - Meta-analysis of genome-wide association data was performed in stage 1 across 15 studies of white European ancestry and a total of 14 SNPs representing the best associating ( $P < 10^{-6}$ ) loci were taken forward for replication. Stage 2 - The 14 SNPs were genotyped in 11 studies of adults of European ancestry, and tested for association with body fat percentage, as well as with BMI, height, weight, risk of obesity, and risk of overweight. Stage 3 - Additional follow-up analyses were performed for the newly identified adiposity loci near the *IRS1* and *SPRY2* genes.

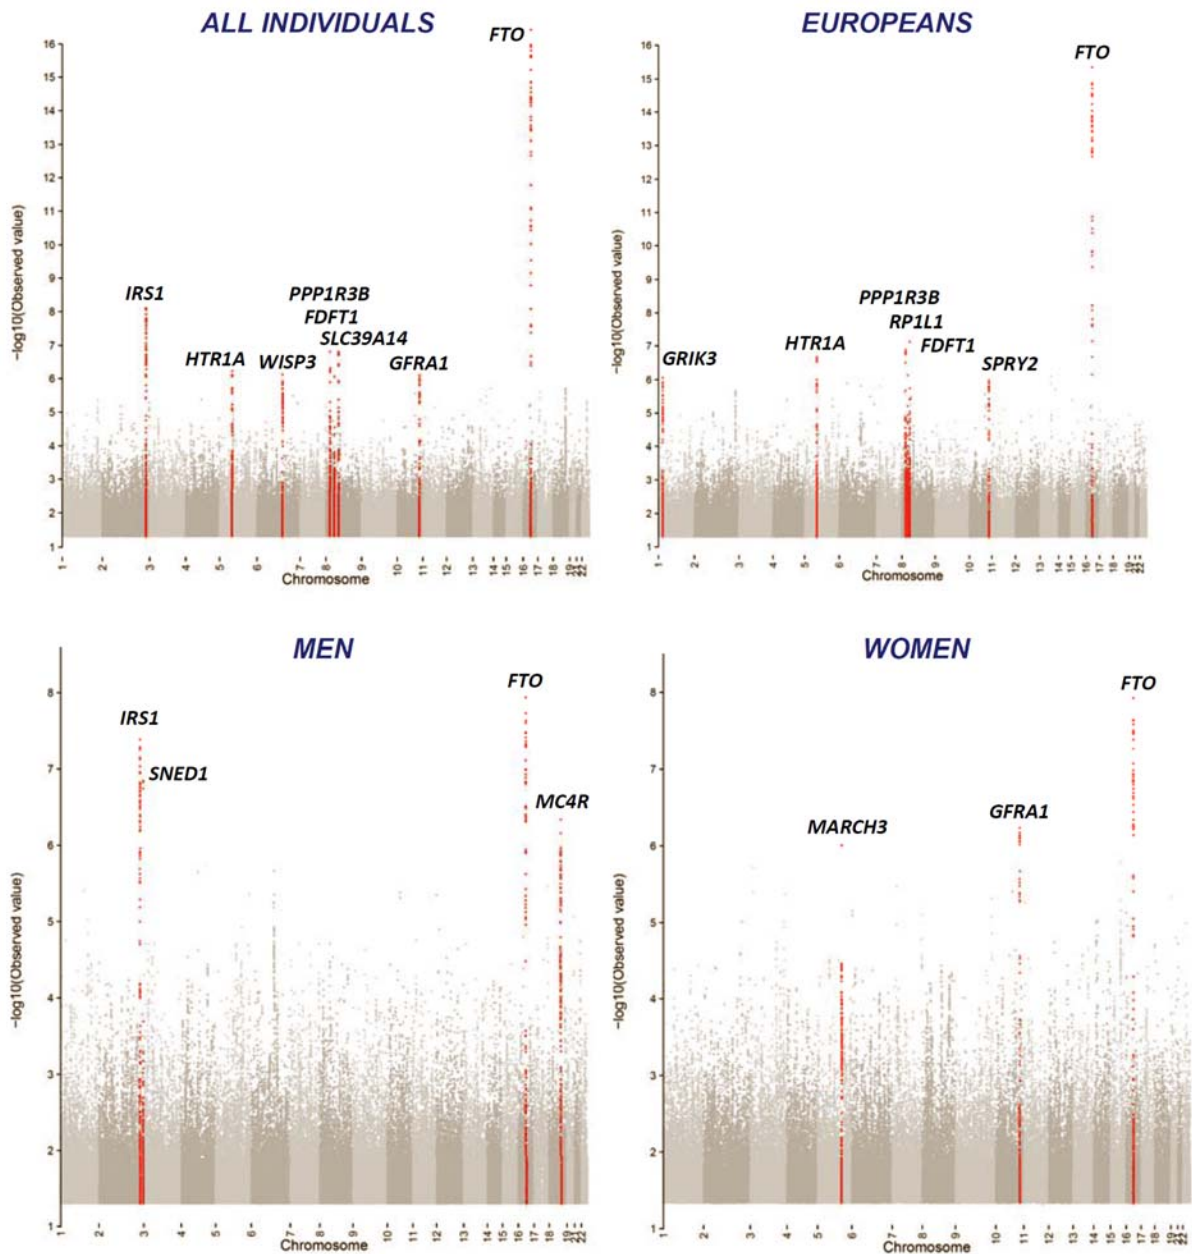

**Supplementary Figure 2** Manhattan plots showing the significance of association with body fat percentage for all SNPs in the stage 1 meta-analysis in all individuals ( $n=36,626$ ), individuals of European descent ( $n=29,069$ ), men ( $n=19,815$ ), and women ( $n=16,811$ ). The  $-\log_{10}P$  values for the association of each single nucleotide polymorphism with BMI are shown on the y-axis. SNPs are plotted on the x-axis according to their position on each chromosome against association with body fat percentage on the y-axis (shown as  $-\log_{10} P$ -value). The loci coloured in red reached a  $P$  value  $<10^{-6}$  in stage 1 meta-analysis and were taken forward for follow-up.

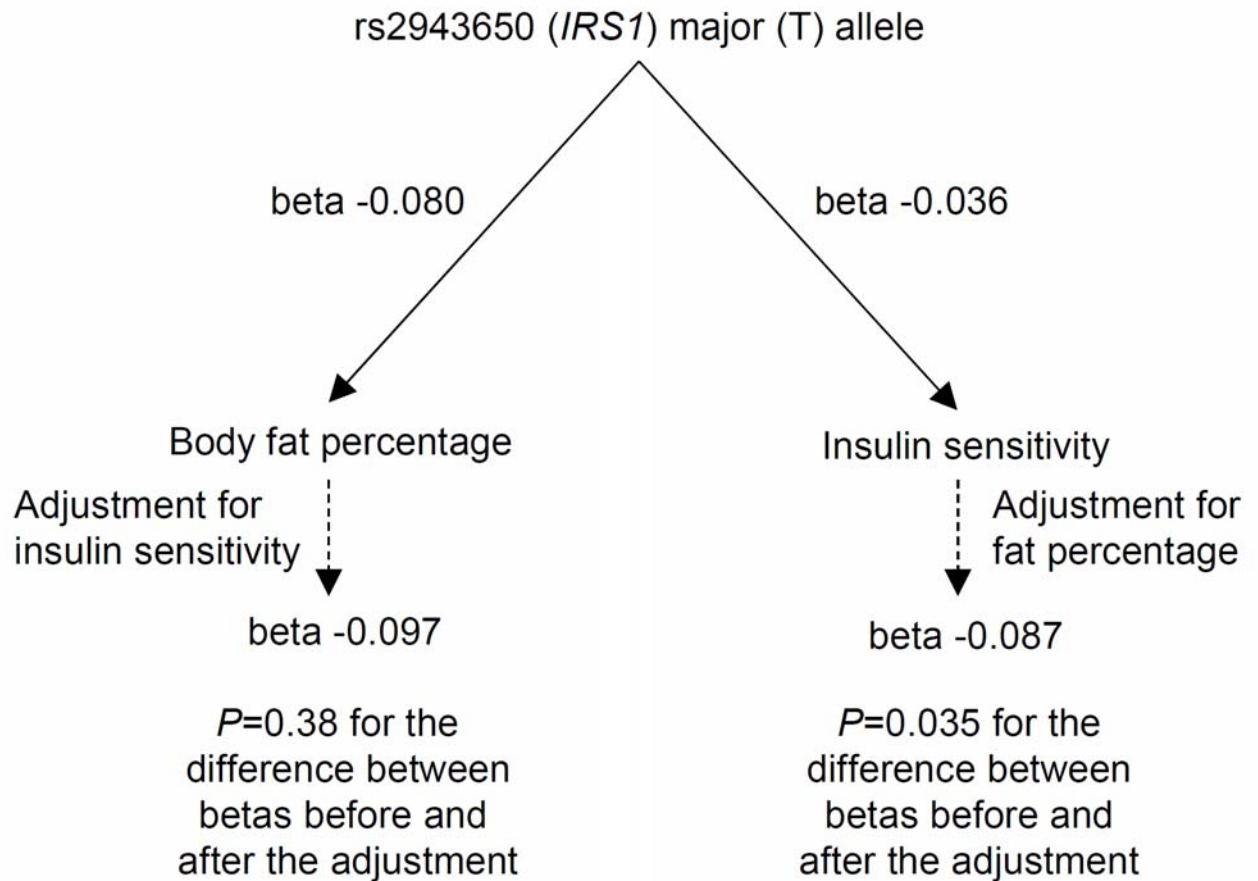

**Supplementary Figure 3** Association of the rs2943650 SNP (near-*IRS1*) body fat percentage decreasing (T) allele with body fat percentage and insulin sensitivity (measured with the Matsuda index) among 6,489 men from the METSIM (Metabolic Syndrome in Men) study with and without adjustment of each trait with the other. Beta, change in phenotype per each body fat percentage decreasing (T) allele of rs2943650.

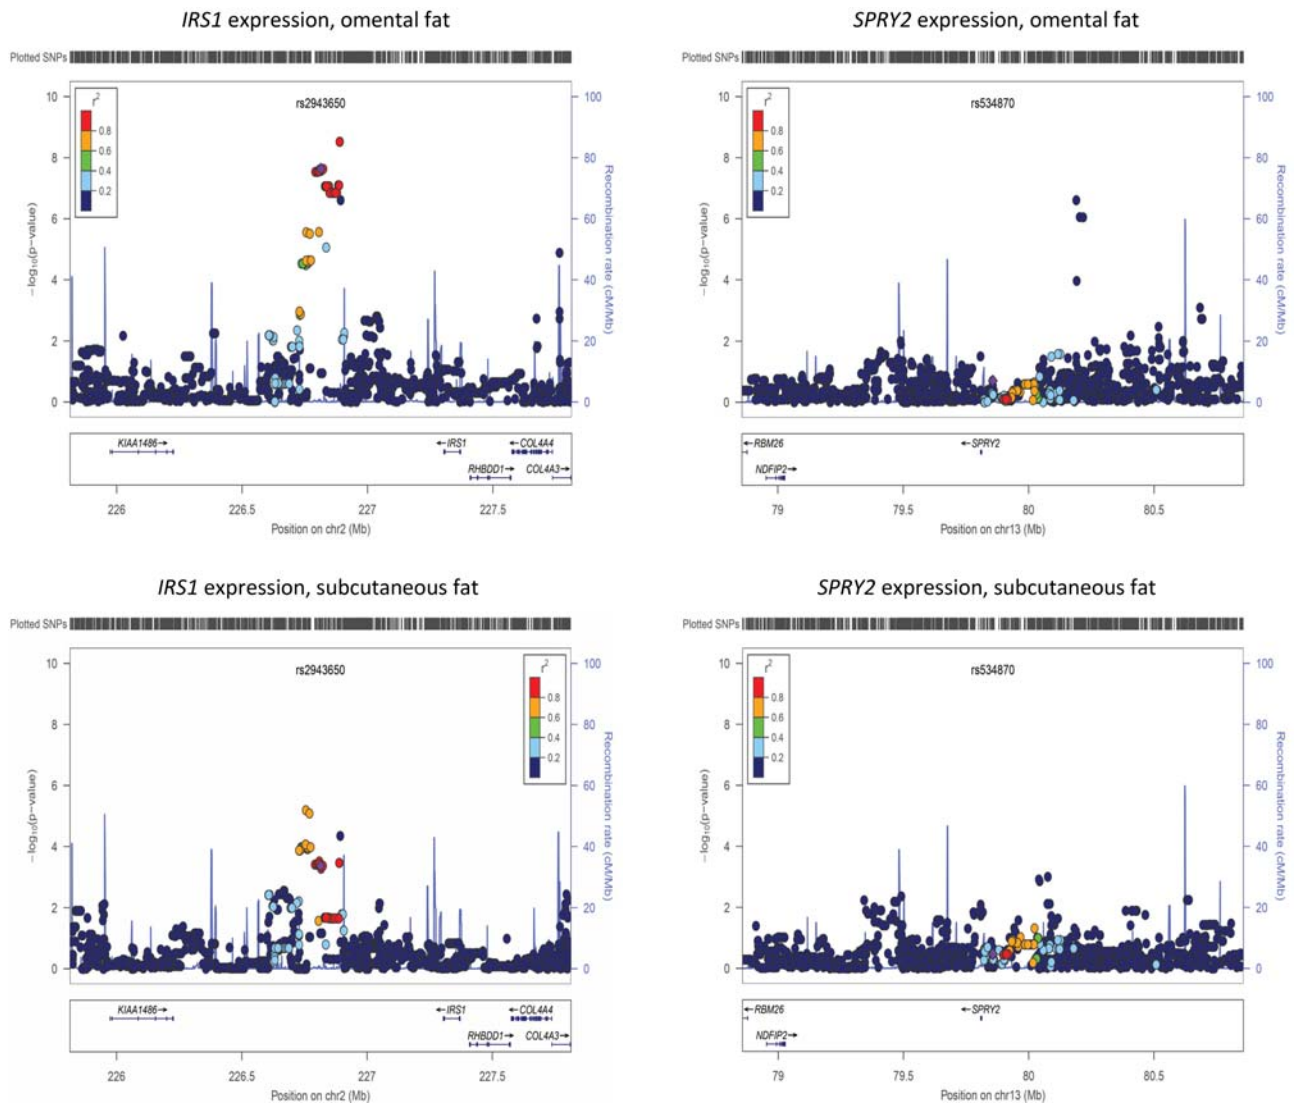

**Supplementary Figure 4** Association of SNPs within  $\pm 1$  Mb from the rs2943650 SNP and  $\pm 1$  Mb from the rs534870 SNP with the expression of *IRS1* and *SPRY2*, respectively, in omental and subcutaneous adipose tissue from patients who underwent bariatric surgery (see Supplementary Note - Methods). The plot was generated using LocusZoom (<http://csg.spg.umic.edu/locuszoom>)<sup>44</sup>.



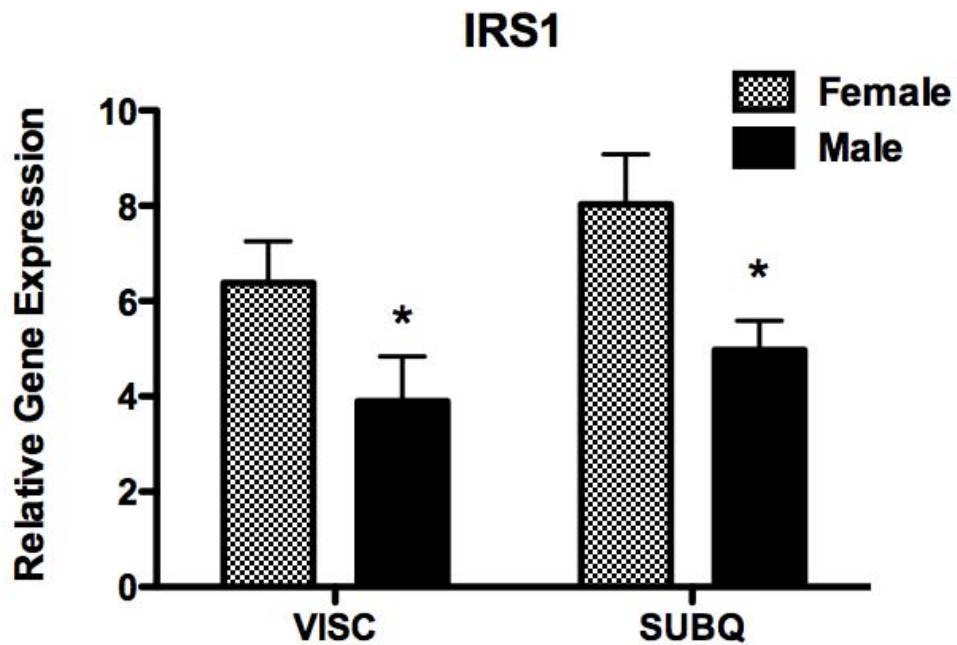

**Supplementary Figure 5** Expression of the *IRS1* gene in isolated adipocytes from visceral and subcutaneous adipose tissues of male and female mice. VISC, adipocytes from visceral adipose tissue. SUBQ, adipocytes from subcutaneous adipose tissue. \*A statistically significant ( $P < 0.05$ ) difference in *IRS1* expression between females and males.

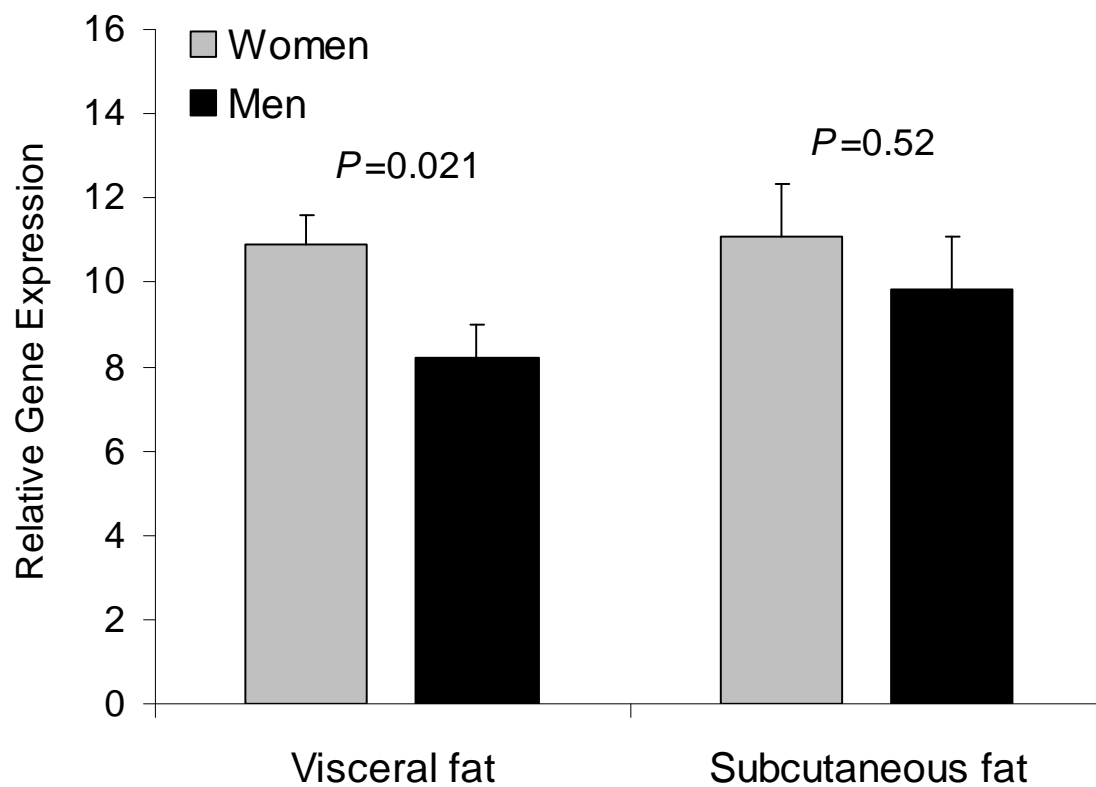

**Supplementary Figure 6** Expression of the *IRS1* gene in visceral and subcutaneous adipose tissues of men and women. *P* values indicate the difference in *IRS1* expression between men and women. The analyses on visceral fat included 26 men and 75 women whereas the analyses on subcutaneous fat included 19 men and 49 women.

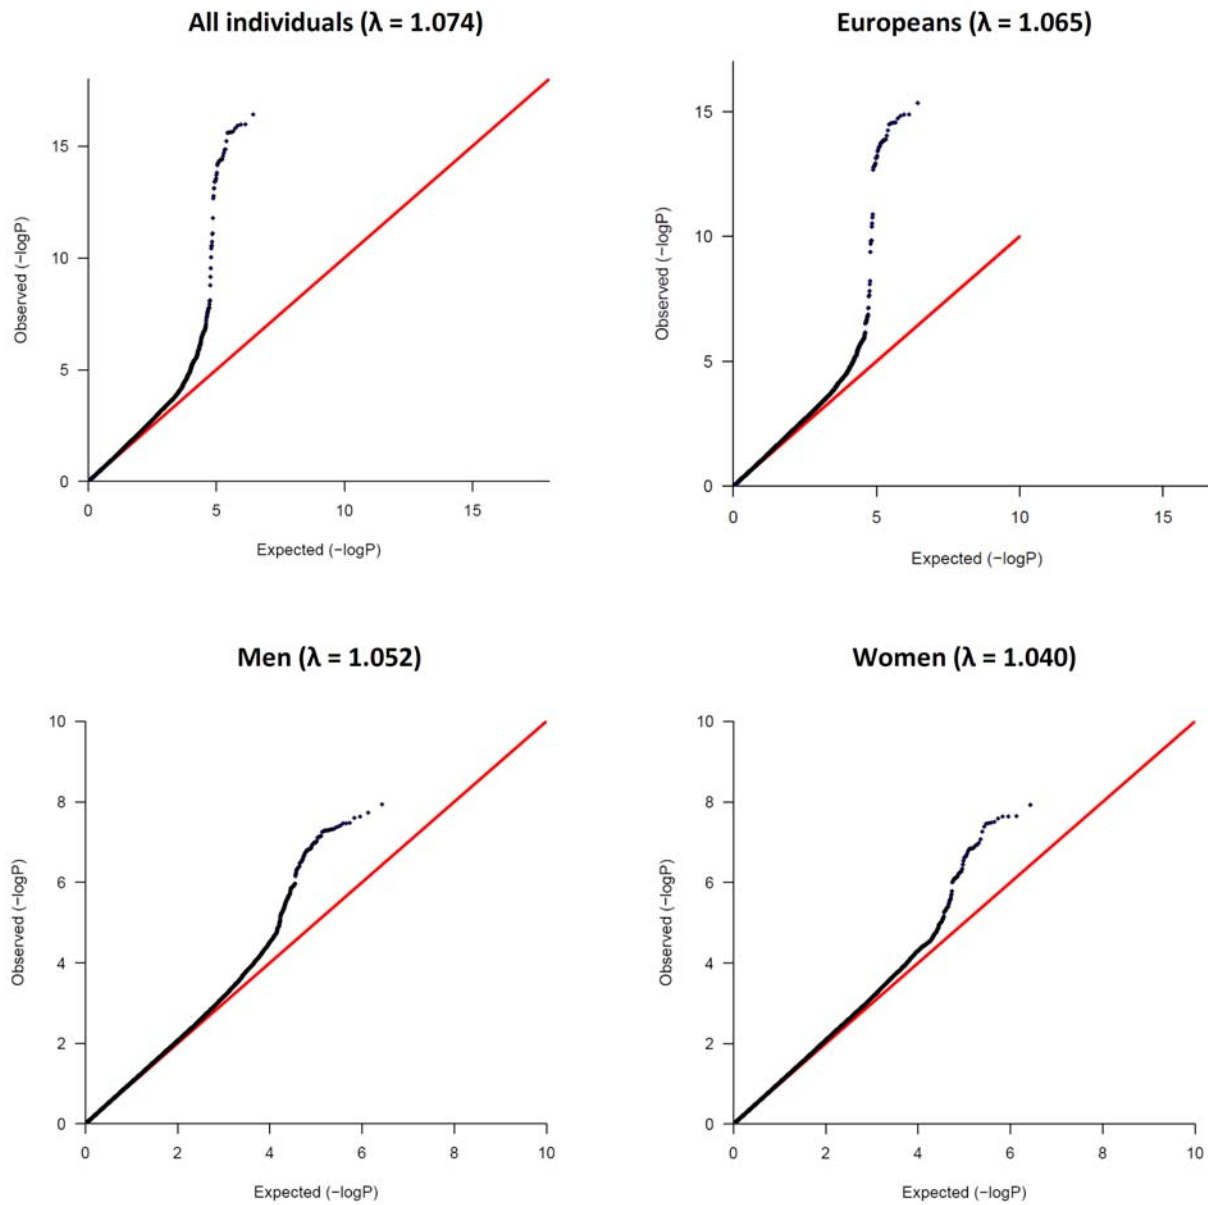

**Supplementary Figure 7** Quantile-quantile plots and genomic control parameters ( $\lambda$ ) for the association with body fat percentage in all individuals ( $n=36,626$ ), individuals of European descent ( $n=29,069$ ), men ( $n=19,815$ ), and women ( $n=16,811$ ). The plots shown were corrected for population stratification by applying a genomic control correction.

## 2. SUPPLEMENTARY NOTE

### 2.1. SUPPLEMENTARY NOTE - TABLES

- Supplementary Note - Table 1** Number of individuals and sample quality control for genome-wide association studies of stage 1.
- Supplementary Note - Table 2** Information on genotyping methods, quality control of SNPs, imputation, and statistical analysis for genome-wide association studies of stage 1.
- Supplementary Note - Table 3** Study-specific descriptive statistics for genome-wide association studies of stage 1.
- Supplementary Note - Table 4** Number of individuals and sample quality control for stage 2 and stage 3 follow-up studies with *de novo* genotyping.
- Supplementary Note - Table 5** Information on genotyping methods, quality control of SNPs, and association analysis software for stage 2 and stage 3 follow-up studies with *de novo* genotyping.
- Supplementary Note - Table 6** Number of individuals and sample quality control for stage 2 and stage 3 follow-up studies with *in silico* genotyping.
- Supplementary Note - Table 7** Information on genotyping methods, quality control of SNPs, imputation, and association analysis software for stage 2 and stage 3 follow-up studies with *in silico* genotyping.
- Supplementary Note - Table 8** Study-specific descriptive statistics for stage 2 and stage 3 follow-up studies.
- Supplementary Note - Table 9** Samples and assays used for the measurement of circulating levels of glucose, insulin, leptin, and adiponectin in the stage 3 follow-up studies.

**Supplementary Note - Table 1** Number of individuals and sample quality control for genome-wide association studies of stage 1

| Study        |                                                                              | Total sample size (N) | Call rate* | Sample QC other exclusions                                                                                                                                                                                                                                           | Samples in analyses (N) | Fat % assessment method | Instrument                             | References                                                                                                                                                                                                                                                                                                                                                                    |
|--------------|------------------------------------------------------------------------------|-----------------------|------------|----------------------------------------------------------------------------------------------------------------------------------------------------------------------------------------------------------------------------------------------------------------------|-------------------------|-------------------------|----------------------------------------|-------------------------------------------------------------------------------------------------------------------------------------------------------------------------------------------------------------------------------------------------------------------------------------------------------------------------------------------------------------------------------|
| Short name   | Full name                                                                    |                       |            |                                                                                                                                                                                                                                                                      |                         |                         |                                        |                                                                                                                                                                                                                                                                                                                                                                               |
| AGES         | Age, Gene/Environment Susceptibility-Reykjavik Study                         | 3,219                 | ≥ 97%      | 1) mismatch with previous genotypes<br>2) remove A/T & G/C SNPs<br>3) remove SNPs not in HapMap                                                                                                                                                                      | 2,375                   | Bioimpedance            | A Xitron HYDRA ECF/ICF, Model 4200     | <b>[PMID: 17351290]</b><br>Harris T, et al. Age, Gene/Environment Susceptibility-Reykjavik Study: multidisciplinary applied phenomics. American Journal of Epidemiology 165, 1076–1087 (2007).                                                                                                                                                                                |
| Amish        | The Old Order Amish                                                          | 1,186                 | ≥ 96%      | 1) failed Mendelian check<br>2) failed duplicate check<br>3) missing body fat percentage data                                                                                                                                                                        | 850                     | DEXA                    | Hologic QDR-4500W                      | <b>[PMID: PMC2443415]</b><br>Mitchell BD, et al. The genetic response to short-term interventions affecting cardiovascular function: Rationale and design of the Heredity and Phenotype Intervention (HAPI) Heart Study. Am Heart J 823, 828 (2008).                                                                                                                          |
| CHS          | Cardiovascular Health Study                                                  | 3,980                 | ≥ 95%      | 1) prevalent clinical CVD<br>2) African-American<br>3) sex discordant<br>4) discordant prior genotyping<br>5) no DEXA scan done                                                                                                                                      | 921                     | DEXA                    | Hologic QDR-2000 Bone densitometer     | <b>[PMID: 11454111]</b><br>Robbins J, et al. The association of bone mineral density and depression in an older population. J Am Geriatr Soc 49, 732-736 (2001).<br><b>[PMID: 1669507]</b><br>Fried LP, et al. The Cardiovascular Health Study: design and rationale. Ann Epidemiol 1, 263-276 (1991).                                                                        |
| CoLaus       | Cohort Lausannoise                                                           | 6,188                 | ≥ 90%      | 1) ethnic outliers<br>2) related individuals and duplicates<br>3) missing body fat percentage data                                                                                                                                                                   | 5,389                   | Bioimpedance            | Bodystat 1500 Analyzer                 | <b>[PMID: 18366642]</b><br>Firmann M, et al. The CoLaus study: a population-based study to investigate the epidemiology and genetic determinants of cardiovascular risk factors and metabolic syndrome. BMC Cardiovasc Dis, 8, 6 (2008).                                                                                                                                      |
| EPIC-Obesity | European Prospective Investigation into Cancer and Nutrition - Obesity Study | 2,566                 | ≥ 94%      | 1) Heterozygosity <23% or >30%<br>2) >5.0% discordance in SNP pairs with r <sup>2</sup> = 1 in HapMap<br>3) ethnic outliers<br>4) related individuals and duplicates<br>5) missing body fat percentage data                                                          | 2,543                   | Bioimpedance            | Tanita BC-531 Body Composition Monitor | <b>[PMID: 10466767]</b><br>Day, N.E. et al. EPIC-Norfolk: study design and characteristics of the cohort. European Prospective Investigation of Cancer. British Journal of Cancer 80, 95-103 (1999).<br><b>[PMID: 18454148]</b><br>Loos, R.J. et al. Common variants near MC4R are associated with fat mass, weight and risk of obesity. Nat Genet 40, 768-775 (2008).        |
| ERF          | Erasmus Rucphen Family                                                       | 2,315                 | > 95%      | 1) gender mismatch<br>2) ethnic outliers<br>3) missing body fat percentage data                                                                                                                                                                                      | 2,087                   | DEXA                    | GE Lunar Prodigy                       | <b>[PMID: 10466767]</b><br>Aulchenko YS. et al. Linkage disequilibrium in young genetically isolated Dutch population. Eur J Hum Genet 12, 527-534 (2004).                                                                                                                                                                                                                    |
| FamHS        | Family Heart Study                                                           | 974                   | ≥ 98%      | 1) technical errors<br>2) discrepancies between reported sex and sex-diagnostic markers                                                                                                                                                                              | 809                     | Bioimpedance            | RJL bioelectric impedance meter        | <b>[PMID: 8651220]</b><br>Higgins, M. et al., NHLBI Family Heart Study: objectives and design, Am J Epidemiol 143, 1219–1228 (1996).                                                                                                                                                                                                                                          |
| Fenland      | Fenland Study                                                                | 1,500                 | ≥ 95%      | 1) failed heterozygosity check: upperbound 0.2882, lowerbound 0.2735<br>2) failed relatedness check (sample with lower call rate in related samples)<br>3) failed duplicate check (sample with lower call rate in duplicates)<br>4) missing body fat percentage data | 1,402                   | DEXA                    | GE Lunar Prodigy                       | <b>[PMID: 20519560]</b><br>De Lucia Rolfe, E. et al. Association between birth weight and visceral fat in adults. Am J Clin Nutr (2009) Jun 2 [Epub ahead of print].<br><b>[PMID: 19079261]</b><br>Willer CJ, Speliotes EK, Loos RJ, et al. Six new loci associated with body mass index highlight a neuronal influence on body weight regulation. Nat Genet 41, 25-34 (2009) |

| Study      |                                                        | Total sample size (N) | Call rate* | Sample QC other exclusions                                                                                                                                                                                                                                                                           | Samples in analyses (N) | Fat % assessment method | Instrument                                       | References                                                                                                                                                                                                                                                                                                                                                                                                                                                                                                                                               |
|------------|--------------------------------------------------------|-----------------------|------------|------------------------------------------------------------------------------------------------------------------------------------------------------------------------------------------------------------------------------------------------------------------------------------------------------|-------------------------|-------------------------|--------------------------------------------------|----------------------------------------------------------------------------------------------------------------------------------------------------------------------------------------------------------------------------------------------------------------------------------------------------------------------------------------------------------------------------------------------------------------------------------------------------------------------------------------------------------------------------------------------------------|
| Short name | Full name                                              |                       |            |                                                                                                                                                                                                                                                                                                      |                         |                         |                                                  |                                                                                                                                                                                                                                                                                                                                                                                                                                                                                                                                                          |
| Framingham | Framingham Heart Study                                 | 3,780                 | ≥ 97%      | 1) autosomal heterozygosity <0.33 or >0.37<br>2) ethnic outliers (using Eigenstrata)<br>3) missing body fat percentage data                                                                                                                                                                          | 2,748                   | DEXA                    | GE Lunar DPX-L                                   | <b>[PMID: 10466767]</b><br>Visser, M. et al. Body fat and skeletal muscle mass in relation to physical disability in very old men and women of the Framingham Heart Study. <i>J Gerontol</i> 53A, M214-M221 (1998).                                                                                                                                                                                                                                                                                                                                      |
| GOOD       | Gothenburg Osteoporosis and Obesity Determinants Study | 1,056                 | ≥ 97.5%    | 1) heterozygosity >33%<br>2) ethnic outliers<br>3) related individuals and duplicates                                                                                                                                                                                                                | 940                     | DEXA                    | GE Lunar Prodigy                                 | <b>[PMID: 16007330]</b><br>Lorentzon, M. et al Free testosterone is a positive whereas free estradiol is a negative predictor of cortical bone size in young Swedish men-The GOOD Study. <i>J Bone Miner Res</i> 20, 1334-1341 (2005).                                                                                                                                                                                                                                                                                                                   |
| KORA S3    | Cooperative Health Research in the Augsburg Region     | NA                    | ≥ 93%      | 1) gender mismatch<br>2) missing body fat percentage data                                                                                                                                                                                                                                            | 1,560                   | Bioimpedance            | DATA-INPUT GmbH BIA 2000-S                       | <b>[PMID: 20031538]</b><br>Heid IM, et al. Genome-wide association analysis of high-density lipoprotein cholesterol in the population-based KORA study sheds new light on intergenic regions. <i>Circ Cardiovasc Genet</i> 1, 10-20 (2008).                                                                                                                                                                                                                                                                                                              |
| KORA S4/F4 | Cooperative Health Research in the Augsburg Region     | NA                    | ≥ 93%      | 1) gender mismatch<br>2) missing body fat percentage data                                                                                                                                                                                                                                            | 1,794                   | Bioimpedance            | DATA-INPUT GmbH BIA 2000-S                       | <b>[PMID: 16032514]</b><br>Wichmann HE, et al. KORA-gen - resource for population genetics, controls and a broad spectrum of disease phenotypes. <i>Gesundheitswesen</i> , 67 Suppl 1, S26-30 (2005).                                                                                                                                                                                                                                                                                                                                                    |
| LOLIPOP    | London Life Sciences Population Study                  | 12,248                | ≥ 95%      | 1) ethnic outliers<br>2) related individuals and duplicates<br>3) wrong genders<br>4) missing body fat percentage data                                                                                                                                                                               | 8,999                   | Bioimpedance            | Tanita TBF-401                                   | <b>[PMID: 18193046]</b><br>Kooner, J.S. et al. Genome-wide scan identifies variation in MLXIPL associated with plasma triglycerides. <i>Nat Genet</i> 40, 149-151 (2008).<br><b>[PMID: 18454146]</b><br>Chambers, J.C. et al. Common genetic variation near MC4R is associated with waist circumference and insulin resistance. <i>Nat Genet</i> 40, 716-718 (2008).<br><b>[PMID: 19820698]</b><br>Chambers, J.C. et al. Genome-wide association study identifies variants in TMPRSS6 associated with hemoglobin. <i>Nat Genet</i> 41, 1170-1172 (2009). |
| ROTTERDAM  | Rotterdam Study                                        | 7,983                 | ≥ 97.5%    | 1) missing DNA<br>2) gender mismatch with typed X-linked markers<br>3) excess autosomal heterozygosity >0.336~FDR>0.1%<br>4) duplicates and/or 1st or 2nd degree relatives using IBS probabilities >97% from PLINK<br>5) ethnic outliers using IBS distances >3SD from PLINK<br>6) missing phenotype | 2,438                   | DEXA                    | Lunar Prodigy, GE Healthcare                     | <b>[PMID: 19700477]</b><br>Estrada, K. et al. GRIMP: a web- and grid-based tool for high-speed analysis of large-scale genome-wide association using imputed data. <i>Bioinformatics</i> 25, 2750-2752 (2009).<br><b>[PMID: 19728115]</b><br>Hofman, A. et al. The Rotterdam Study: 2010 objectives and design update. <i>Eur J Epidemiol</i> 24, 553-572 (2009).<br><b>[PMID: 1833235]</b><br>Hofman, A. et al. Determinants of disease and disability in the elderly: the Rotterdam Elderly Study. <i>Eur J Epidemiol</i> 7, 403-422 (1991).           |
| TWINS UK   | Twins UK                                               | 5,654                 | ≥ 98%      | 1) failed ethnicity check<br>2) failed relatedness check<br>3) failed zygosity check<br>4) failed population stratification check<br>5) missing body fat percentage data                                                                                                                             | 1,688                   | DEXA                    | Hologic Discovery W' - QDR software version 12.6 | <b>[PMID: 19343178]</b><br>Soranzo, N. et al. Meta-analysis of genome-wide scans for human adult stature identifies novel Loci and associations with measures of skeletal frame size. <i>PLoS Genet</i> 5(4):e1000445 (2009)                                                                                                                                                                                                                                                                                                                             |

\* Sample genotyping success rate; i.e. minimum percentage of successfully genotyped SNPs per sample

**Supplementary Note - Table 2** Information on genotyping methods, quality control of SNPs, imputation, and statistical analysis for genome-wide association studies of stage 1

| Study                      | Platform                                       | Genotyping                 |                               |                    | SNPs that met QC criteria | Imputation          |                                   | SNPs in meta-analysis | Association analyses |                    |       | Analysis software |
|----------------------------|------------------------------------------------|----------------------------|-------------------------------|--------------------|---------------------------|---------------------|-----------------------------------|-----------------------|----------------------|--------------------|-------|-------------------|
|                            |                                                | Genotype calling algorithm | Inclusion criteria Call rate* | p for HWE          |                           | Imputation software | Imputation quality*               |                       | All                  | Men $\lambda_{GC}$ | Women |                   |
| AGES                       | Illumina 370K                                  | BeadStudio                 | ≥ 95%                         | > 10 <sup>-6</sup> | 315,410                   | MACH                | r2-hat ≥ 0.30                     | 2,465,997             | -                    | 1.020              | 1.029 | ProbABEL          |
| Amish                      | Affymetrix 500K                                | BRLMM                      | ≥ 96%                         | > 10 <sup>-6</sup> | 382,935                   | MACH                | r2-hat ≥ 0.30                     | 2,302,463             | 1.049                | 1.018              | 1.077 | ITSNBN            |
| CHS                        | Illumina 370-CNV                               | BeadStudio                 | > 97%                         | > 10 <sup>-5</sup> | 306,655                   | BimBam              | observed/expected variance ≥ 0.30 | 2,195,299             | -                    | 1.014              | 1.020 | R                 |
| CoLaus                     | Affymetrix 500K                                | BRLMM                      | > 70%                         | > 10 <sup>-7</sup> | 390,631                   | IMPUTE              | proper-info ≥ 0.40                | 2,439,888             | -                    | 1.020              | 1.022 | QUICKTEST         |
| EPIC-Obesity (obese cases) | Affymetrix 500K                                | BRLMM                      | ≥ 90%                         | > 10 <sup>-6</sup> | 397,438                   | IMPUTE              | proper-info ≥ 0.40                | 2,381,011             | -                    | 1.170              | 0.994 | SNPtest           |
| EPIC-Cohort (controls)     | Affymetrix 500K                                | BRLMM                      | ≥ 90%                         | > 10 <sup>-6</sup> | 397,438                   | IMPUTE              | proper-info ≥ 0.40                | 2,428,445             | -                    | 0.992              | 0.995 | SNPtest           |
| ERF                        | Illumina 318K and 370K<br>Affymetrix 250K      | BeadStudio, BRLMM          | ≥ 96%                         | > 10 <sup>-6</sup> | 487,573                   | MACH                | r2-hat ≥ 0.30                     | 2,468,052             | 1.017                | 1.001              | 1.017 | ProbABEL          |
| FamHS                      | Illumina 1 Million                             | BeadStudio                 | ≥ 98%                         | > 10 <sup>-6</sup> | 874,830                   | MACH                | r2-hat ≥ 0.30                     | 2,375,698             | 1.031                | 1.035              | 1.043 | SAS               |
| Fenland                    | Affymetrix 500K                                | BRLMM                      | ≥ 90%                         | > 10 <sup>-6</sup> | 362,055                   | IMPUTE              | proper-info ≥ 0.40                | 2,427,084             | -                    | 1.014              | 1.006 | SNPtest           |
| Framingham                 | Affymetrix 500K<br>Affymetrix 50K supplemental | BRLMM                      | ≥ 97%                         | > 10 <sup>-6</sup> | 378,163                   | MACH                | r2-hat ≥ 0.30                     | 2,455,944             | 0.991                | 1.020              | 1.012 | R                 |
| GOOD                       | Illumina 610K                                  | BeadStudio                 | ≥ 98%                         | > 10 <sup>-6</sup> | 521,160                   | MACH                | r2-hat ≥ 0.30                     | 2,503,211             | -                    | 1.015              | -     | MACH2QTL          |
| KORAS3                     | Affymetrix 500K                                | BRLMM                      | ≥ 90%                         | -                  | 490,032                   | MACH                | r2-hat ≥ 0.30                     | 2,416,530             | -                    | 1.002              | 1.010 | MACH2QTL          |
| KORAS4/F4                  | Affymetrix 6.0                                 | Birdseed2                  | -                             | -                  | 909,622                   | IMPUTE              | proper-info ≥ 0.40                | 2,040,316             | -                    | 1.023              | 0.993 | SNPtest           |
| LOLIPOP                    | Affymetrix 500K (Caucasians)                   | BRLMM                      | > 90%                         | > 10 <sup>-6</sup> | 374,773                   | MACH                | r2-hat ≥ 0.30                     | 2,444,407             | -                    | 1.018              | 0.989 | MACH2QTL          |
| LOLIPOP                    | Illumina 317K (Indian-Asians)                  | Beadstudio                 | > 90%                         | > 10 <sup>-6</sup> | 245,892                   | MACH                | r2-hat ≥ 0.30                     | 1,896,366             | -                    | 1.003              | -     | MACH2QTL          |
| LOLIPOP                    | Illumina 610K (Indian-Asians)                  | Beadstudio                 | > 90%                         | > 10 <sup>-6</sup> | 544,390                   | MACH                | r2-hat ≥ 0.30                     | 2,147,795             | -                    | 1.027              | 1.014 | MACH2QTL          |
| LOLIPOP                    | Perlegen (Caucasians)                          | Custom                     | > 90%                         | > 10 <sup>-6</sup> | 202,544                   | MACH                | r2-hat ≥ 0.30                     | 2,398,436             | -                    | 1.007              | -     | MACH2QTL          |
| LOLIPOP                    | Perlegen (Indian-Asians)                       | Custom                     | > 90%                         | > 10 <sup>-6</sup> | 170,055                   | MACH                | r2-hat ≥ 0.30                     | 1,546,962             | -                    | 0.979              | -     | MACH2QTL          |
| Rotterdam                  | Illumina Infinium 550                          | BeadStudio                 | ≥ 97.5%                       | > 10 <sup>-6</sup> | 512,349                   | MACH                | r2-hat ≥ 0.30                     | 2,488,215             | -                    | 1.010              | 1.019 | MACH2QTL          |
| Twins UK                   | Illumina 317K                                  | BeadStudio                 | ≥ 95%                         | > 10 <sup>-6</sup> | 307,040                   | IMPUTE              | proper-info ≥ 0.40                | 2,278,608             | -                    | -                  | 1.052 | Merlin            |

\* SNP genotyping success rate; i.e. minimum percentage of successfully genotyped samples per SNP

**Supplementary Note - Table 3** Study-specific descriptive statistics for genome-wide association studies of stage 1

| Study                   | Men   |                       |                                     |                        |                         |                                    |                   | Women |                       |                                     |                        |                         |                                    |                              |
|-------------------------|-------|-----------------------|-------------------------------------|------------------------|-------------------------|------------------------------------|-------------------|-------|-----------------------|-------------------------------------|------------------------|-------------------------|------------------------------------|------------------------------|
|                         | N     | Age, yrs<br>mean (sd) | BMI, kg/m <sup>2</sup><br>mean (sd) | Height, m<br>mean (sd) | Weight, kg<br>mean (sd) | Total fat mass,<br>kg<br>mean (sd) | Fat%<br>mean (sd) | N     | Age, yrs<br>mean (sd) | BMI, kg/m <sup>2</sup><br>mean (sd) | Height, m<br>mean (sd) | Weight, kg<br>mean (sd) | Total fat mass,<br>kg<br>mean (sd) | Total body fat%<br>mean (sd) |
| AGES                    | 1,019 | 49.7 (5.9)            | 25.6 (3.1)                          | 1.78 (0.06)            | 81.3 (11.4)             | -                                  | 22.0 (5.5)        | 1,356 | 52.0 (6.5)            | 24.9 (3.8)                          | 1.64 (0.05)            | 67.1 (10.5)             | -                                  | 34.0 (5.0)                   |
| Amish                   | 406   | 50.7 (15.0)           | 26.5 (3.4)                          | 1.72 (0.06)            | 78.2 (12.1)             | 15.9 (7.5)                         | 19.7 (6.5)        | 444   | 52.2 (14.4)           | 28.4 (5.4)                          | 1.60 (0.06)            | 72.4 (14.4)             | 25.8 (8.9)                         | 35.4 (6.5)                   |
| CHS                     | 349   | 77.6 (5.0)            | 26.5 (3.4)                          | 1.73 (0.06)            | 79.4 (10.9)             | 23.1 (7.7)                         | 29.4 (6.6)        | 572   | (76.9 (4.3)           | 26.1 (4.4)                          | 1.59 (0.06)            | 66.2 (12.1)             | 28.4 (9.6)                         | 42.6 (7.5)                   |
| CoLaus                  | 2,539 | 52.9 (10.8)           | 26.6 (4.2)                          | 1.75 (0.07)            | 81.5 (13.4)             | -                                  | 23.9 (6.0)        | 2,850 | 53.9 (10.7)           | 25.2 (4.9)                          | 1.62 (0.07)            | 66.4 (13.0)             | -                                  | 34.4 (8.2)                   |
| EPIC-Obesity            | 1,121 | 63.2 (8.9)            | 28.4 (3.9)                          | 1.74 (0.07)            | 85.9 (13.0)             | 19.9 (7.6)                         | 26.4 (7.1)        | 1,422 | 62.2 (8.7)            | 28.5 (5.2)                          | 1.61 (0.06)            | 74.1 (13.8)             | 28.4 (11.1)                        | 43.8 (10.5)                  |
| ERF                     | 900   | 48.8 (14.5)           | 27.2 (3.97)                         | 1.75 (0.07)            | 82.8 (13.5)             | 22.0 (8.6)                         | 26.9 (7.1)        | 1187  | 47.7 (14.5)           | 26.4 (4.8)                          | 1.61 (0.07)            | 69.1 (13.1)             | 26.4 (9.7)                         | 38.7 (7.6)                   |
| FamHS                   | 388   | 59.9 (12.3)           | 29.6 (4.8)                          | 1.76 (0.07)            | 91.8 (15.8)             | 30.7 (10.5)                        | 27.9 (7.6)        | 421   | 64.6 (9.8)            | 28.7 (6.3)                          | 1.60 (0.06)            | 74.4 (17.6)             | 33.6 (12.8)                        | 38.7 (7.7)                   |
| Fenland                 | 615   | 44.5 (7.4)            | 27.6 (3.9)                          | 1.77 (0.07)            | 86.8 (13.9)             | 24.7 (8.6)                         | 28.0 (6.7)        | 787   | 45.3 (7.2)            | 26.7 (5.5)                          | 1.64 (0.06)            | 71.5 (15.3)             | 27.4 (10.7)                        | 37.6 (7.7)                   |
| Framingham              | 1,003 | 64.1 (11.2)           | 26.7 (2.9)                          | 1.73 (0.07)            | 80.1 (10.2)             | 22.8 (6.1)                         | 28.2 (5.5)        | 1745  | 64.3 (11.4)           | 26.3 (4.3)                          | 1.60 (0.07)            | 67.1 (11.6)             | 27.9 (8.8)                         | 41.1 (7.3)                   |
| GOOD                    | 940   | 18.9 (0.6)            | 22.4 (3.2)                          | 1.82 (0.07)            | 73.9 (11.6)             | 13.2 (7.9)                         | 17.1 (7.4)        | 0     | -                     | -                                   | -                      | -                       | -                                  | -                            |
| KORAF3                  | 773   | 62.5 (10.0)           | 28.2 (3.5)                          | 1.73 (0.07)            | 84.9 (12.1)             | 24.3 (7.3)                         | 28.1 (5.0)        | 787   | 61.6 (9.9)            | 27.9 (5.0)                          | 1.61 (0.06)            | 71.9 (13.2)             | 28.1 (8.5)                         | 38.4 (5.2)                   |
| KORAS4/F4               | 874   | 54.1 (8.9)            | 28.4 (4.2)                          | 1.74 (0.07)            | 86.5 (14.1)             | 24.3 (7.6)                         | 28.0 (4.9)        | 920   | 53.6 (8.8)            | 27.9 (5.3)                          | 1.61 (0.06)            | 72.6 (13.7)             | 27.3 (8.6)                         | 37.5 (5.4)                   |
| Lolipop - Europeans     | 1,238 | 55.0 (9.7)            | 28.3 (4.7)                          | 1.75 (0.07)            | 86.8 (15.7)             | 24.8 (11.3)                        | 27.5 (7.8)        | 204   | 51.3 (10.4)           | 27.2 (5.7)                          | 1.63 (0.06)            | 72.5 (15.5)             | 28.0 (10.9)                        | 37.3 (7.0)                   |
| Lolipop - Indian-Asians | 6,535 | 54.0 (10.9)           | 27.0 (4.1)                          | 1.70 (0.07)            | 78.4 (13.4)             | 22.2 (9.3)                         | 27.5 (7.3)        | 1,022 | 56.9 (10.0)           | 28.8 (5.3)                          | 1.56 (0.06)            | 69.5 (12.7)             | 27.8 (9.1)                         | 39.1 (6.4)                   |
| Rotterdam               | 1,043 | 63.9 (5.6)            | 25.9 (2.8)                          | 1.76 (0.06)            | 80.5 (10.0)             | 23.4 (7.6)                         | 28.9 (6.2)        | 1,395 | 64.2 (6.0)            | 26.3 (3.8)                          | 1.63 (0.06)            | 70.2 (10.7)             | 28.4 (8.8)                         | 29.0 (6.6)                   |
| Twins UK                | 0     | -                     | -                                   | -                      | -                       | -                                  | -                 | 1,688 | 47.5(12.4)            | 24.9(4.5)                           | 1.63(0.06)             | 65.7(12.3)              | -                                  | 33.4(7.4)                    |



**Supplementary Note - Table 4** Number of individuals and sample quality control for stage 2 and stage 3 follow-up studies with *de novo* genotyping

| Study                 | Total sample size (N)                                                        | Exclusions | Samples in analyses (N)                                                                 | Fat % assessment method | Instrument   | References                               |                                                                                                                                                                                                                                                                                                                                                                                      |
|-----------------------|------------------------------------------------------------------------------|------------|-----------------------------------------------------------------------------------------|-------------------------|--------------|------------------------------------------|--------------------------------------------------------------------------------------------------------------------------------------------------------------------------------------------------------------------------------------------------------------------------------------------------------------------------------------------------------------------------------------|
| Short name            | Full name                                                                    |            |                                                                                         |                         |              |                                          |                                                                                                                                                                                                                                                                                                                                                                                      |
| BPPP                  | Botnia Prevalence, Prediction and Prevention of Diabetes study               | 1,889      | 1) Missing phenotypes<br>2) Missing DNA                                                 | 1,870                   | Bioimpedance | Tanita BF-350                            | <b>[PMID: 20454776]</b><br>Isomaa B. et al. A family history of diabetes is associated with reduced physical fitness in the Prevalence, Prediction, and Prevention of Diabetes (PPP)-Botnia study. <i>Diabetologia</i> 53, 1709-1713 (2010).                                                                                                                                         |
| EPIC-Norfolk          | European Prospective Investigation into Cancer and Nutrition - Obesity Study | 25,663     | 1) Missing phenotypes<br>2) Missing DNA                                                 | 10,282                  | Bioimpedance | Tanita BC-531 Body Composition Monitor   | <b>[PMID: 10466767]</b><br>Day, N.E. et al. EPIC-Norfolk: study design and characteristics of the cohort. <i>European Prospective Investigation of Cancer. British Journal of Cancer</i> 80, 95-103 (1999).<br><b>[PMID: 18454148]</b><br>Loos, R.J. et al. Common variants near MC4R are associated with fat mass, weight and risk of obesity. <i>Nat Genet</i> 40, 768-775 (2008). |
| METSIM                | Metabolic Syndrome In Men Study                                              | 8,740      | 1.)Missing phenotypes<br>2) Missing DNA                                                 | 7,470                   | Bioimpedance | Akern Bioimpedance Analyzer Model BIA101 | <b>[PMID: 19223598]</b><br>Stančáková, A. et al. Changes in insulin sensitivity and insulin release in relation to glycemia and glucose tolerance in 6,414 Finnish Men. <i>Diabetes</i> 58, 1212-1221 (2009).                                                                                                                                                                        |
| MrOS Sweden - Hologic | Osteoporotic Fracture in Men Study - Sweden                                  | 1,010      | 1) Missing phenotypes<br>2) Missing DNA                                                 | 917                     | DEXA         | Hologic QDR, 4500/A-Delphi               | <b>[PMID: 16598372]</b><br>Mellström, D.. et al. Free testosterone is an independent predictor of BMD and prevalent fractures in elderly men: MrOS Sweden. <i>J Bone Miner Res</i> 21, 529-535 (2006).                                                                                                                                                                               |
| MrOS Sweden - Lunar   | Osteoporotic Fracture in Men Study - Sweden                                  | 2,004      | 1) Missing phenotypes<br>2) Missing DNA                                                 | 1,946                   | DEXA         | GE Lunar Prodigy                         | <b>[PMID: 16598372]</b><br>Mellström, D.. et al. Free testosterone is an independent predictor of BMD and prevalent fractures in elderly men: MrOS Sweden. <i>J Bone Miner Res</i> 21, 529-535 (2006).                                                                                                                                                                               |
| RISC                  | Relationship between Insulin Sensitivity and Cardiovascular Disease          | 1,308      | 1) Missing DNA<br>2) Missing phenotypes                                                 | 1,247                   | Bioimpedance | Tanita TBF-300 Body Composition Analyser | <b>[PMID: 14968294]</b><br>Hills, S.A. et al. The EGIR-RISC STUDY (The European group for the study of insulin resistance: relationship between insulin sensitivity and cardiovascular disease risk): methodology and objectives. <i>Diabetologia</i> 47, 566-570 (2004).                                                                                                            |
| ULSAM                 | Uppsala Longitudinal Study of Adult Men                                      | 1,221      | 1) Missing DNA<br>2) Missing phenotypes<br>3) Prevalent diabetes (FG>=7.0 mmol/L or Rx) | 960                     | BMI          | -                                        | <b>[PMID: 16030278]</b><br>Ingelsson, E. et al. Insulin resistance and risk of congestive heart failure. <i>JAMA</i> 294, 334-341 (2005).                                                                                                                                                                                                                                            |

\* Sample genotyping success rate; i.e. minimum percentage of successfully genotyped SNPs of GWAs per sample

**Supplementary Note - Table 5.** Information on genotyping methods, quality control of SNPs, and association analysis software for stage 2 and stage 3 follow-up studies with *de novo* genotyping

| Study                 | Genotyping Platform                                                                                     | Inclusion criteria |                       |           | Analysis software |
|-----------------------|---------------------------------------------------------------------------------------------------------|--------------------|-----------------------|-----------|-------------------|
|                       |                                                                                                         | Call rate*         | Duplicate concordance | p for HWE |                   |
| EPIC-Norfolk          | Custom TaqMan® SNP Genotyping Assays (Applied Biosystems, Warrington, UK)<br>iPLEX™ Sequenom MassARRAY® | ≥ 93%              | ≥ 97%                 | > 0.05    | SAS               |
| BPPP                  | iPLEX™ Sequenom MassARRAY®                                                                              | ≥ 99%              | NA                    | >0.0001   | PLINK             |
| METSIM                | Custom TaqMan® SNP Genotyping Assays (Applied Biosystems, Warrington, UK)                               | ≥ 95%              | ≥ 96%                 | >0.05     | SPSS              |
| MrOS Sweden - Hologic | iPLEX™ Sequenom MassARRAY®                                                                              | ≥ 98%              | ≥ 97%                 | > 0.45    | SAS               |
| MrOS Sweden - Lunar   | iPLEX™ Sequenom MassARRAY®                                                                              | ≥ 98%              | ≥ 97%                 | > 0.42    | SAS               |
| RISC                  | Fluorescence-based competitive allele-specific PCR (Kbiosciences, Hoddesdon, UK)                        | ≥ 98%              | ≥ 98%                 | > 0.05    | SAS               |
| ULSAM                 | Single-base extension with fluorescence polarization detection                                          | ≥ 99%              | 100%                  | > 0.05    | STATA             |

NA, data not available

\* SNP genotyping success rate; i.e. minimum percentage of successfully genotyped samples per SNP

Supplementary Note - Table 6. Number of individuals and sample quality control for stage 2 and stage 3 follow-up studies within *silico* genotyping

| Study        |                                          | Total sample size (N) | Sample QC  |                                                                                                                                       | Samples in analyses (N) | Fat % assessment method | Instrument                                       | References                                                                                                                                                                                                                                                                                                                                                                                       |
|--------------|------------------------------------------|-----------------------|------------|---------------------------------------------------------------------------------------------------------------------------------------|-------------------------|-------------------------|--------------------------------------------------|--------------------------------------------------------------------------------------------------------------------------------------------------------------------------------------------------------------------------------------------------------------------------------------------------------------------------------------------------------------------------------------------------|
| Short name   | Full name                                |                       | Call rate* | Other exclusions                                                                                                                      |                         |                         |                                                  |                                                                                                                                                                                                                                                                                                                                                                                                  |
| deCODE       | deCODE genetics sample set               | 38,446                | ≥ 98%      | 1) missing phenotype<br>2) missing genotype                                                                                           | 2,547                   | DEXA                    | Hologic QDR4500A                                 | <b>[PMID: 19079260]</b><br>Thorleifsson, G. et al. Genome-wide association yields new sequence variants at seven loci that associate with measures of obesity. <i>Nat Genet</i> 41, 18-24 (2009).                                                                                                                                                                                                |
| Fenland      | Fenland Study                            | -                     | ≥ 95%      | 1) gender check<br>2) duplicates check<br>3) missing phenotype                                                                        | 3,132                   | DEXA                    | GE Lunar Prodigy                                 | <b>[PMID: 20519560]</b><br>De Lucia Rolfe, E. et al. Association between birth weight and visceral fat in adults. <i>Am J Clin Nutr</i> (2009) Jun 2 [Epub ahead of print].<br><b>[PMID: 19079261]</b><br>Willer CJ, Speliotes EK, Loos RJ, et al. Six new loci associated with body mass index highlight a neuronal influence on body weight regulation. <i>Nat Genet</i> 41, 25-34 (2009)      |
| Genmets      | Health2000 GenMets MS Cases and Controls | 2,124                 | >95%       | 1) heterozygosity check<br>2) gender check<br>3) cryptic relatedness<br>4) missing phenotypes                                         | 1,726                   | Bioimpedance            | InBody 3.0                                       | <b>[PMID: 19554302]</b><br>Perttälä J, et al. OSBL10, a novel candidate gene for high triglyceride trait in dyslipidemic Finnish subjects, regulates cellular lipid metabolism. <i>J Mol Med</i> 87, 825-835 (2009)                                                                                                                                                                              |
| MRC Ely      | MRC Ely Study                            | -                     | ≥ 95%      | 1) gender check<br>2) duplicates check<br>3) missing phenotype                                                                        | 1,582                   | DEXA                    | GE Lunar Prodigy                                 | <b>[PMID: 17257284]</b><br>Forouhi, N.G. et al. Incidence of type 2 diabetes in England and its association with baseline impaired fasting glucose: the Ely study 1990-2000. <i>Diabet Med</i> 24, 200-207 (2007)                                                                                                                                                                                |
| ORCADES      | Orkney Complex Disease Study             | ~1,000                | ≥ 97%      | 1) ethnic outliers<br>2) missing phenotype<br>3) missing genotype<br>4) genotypes not imputed<br>5) duplicate samples                 | 719                     | Bioimpedance            | Tanita TBF-300 Body Composition Analyser         | <b>[PMID: 18952825]</b><br>Johansson, A. et al. Common variants in the JAZF1 gene associated with height identified by linkage and genome-wide association analysis. <i>Hum Mol Genet</i> 18, 373-380 (2009).<br><b>[PMID: 19798445]</b><br>Hicks, A.A. et al. Genetic determinants of circulating sphingolipid concentrations in European populations. <i>PLoS Genet</i> 5(10):e1000672 (2009). |
| Twins UK     | Twins UK                                 | 5,654                 | ≥ 98%      | 1) ethnic outlier<br>2) failed relatedness<br>3) failed zygosity<br>4) failed population stratification check<br>5) missing phenotype | 1,691                   | DEXA                    | Hologic Discovery W' - QDR software version 12.6 | <b>[PMID: 19343178]</b><br>Soranzo, N. et al. Meta-analysis of genome-wide scans for human adult stature identifies novel Loci and associations with measures of skeletal frame size. <i>PLoS Genet</i> 5(4):e1000445 (2009)                                                                                                                                                                     |
| VIS          | VIS-CROATIA                              | 1,056                 | ≥ 97%      | 1) ethnic outliers<br>2) missing phenotype<br>3) missing genotype<br>4) genotypes not imputed<br>5) duplicate samples                 | 781                     | Bioimpedance            | Akern Soft-Tissue-Analyzer-STA                   | <b>[PMID: 18952825]</b><br>Johansson, A. et al. Common variants in the JAZF1 gene associated with height identified by linkage and genome-wide association analysis. <i>Hum Mol Genet</i> 18, 373-380 (2009).<br><b>[PMID: 19798445]</b><br>Hicks, A.A. et al. Genetic determinants of circulating sphingolipid concentrations in European populations. <i>PLoS Genet</i> 5(10):e1000672 (2009). |
| Whitehall II | Whitehall II                             | 5,592                 | ≥ 98%      | 1) non-white ethnicity<br>2) outliers in Plink<br>3) missing phenotype                                                                | 3,949                   | Bioimpedance            | Tanita TBF-300 Body Composition Analyser         | <b>[PMID: 15576467]</b><br>Marmot, M. et al. Cohort Profile: The Whitehall II Study. <i>Int J Epidemiol</i> 34, 251-256 (2005).                                                                                                                                                                                                                                                                  |

\* Sample genotyping success rate; i.e. minimum percentage of successfully genotyped SNPs of GWAs per sample

**Supplementary Note - Table 7.** Information on genotyping methods, quality control of SNPs, imputation, and association analysis software for stage 2 and stage 3 follow-up studies with *in silico* genotyping

| Study        | Genotyping                                                                              |                            |      |                                            |                    | SNPs that met QC criteria | Imputation software | Imputation |                    | Association analyses |                   |
|--------------|-----------------------------------------------------------------------------------------|----------------------------|------|--------------------------------------------|--------------------|---------------------------|---------------------|------------|--------------------|----------------------|-------------------|
|              | Platform                                                                                | Genotype calling algorithm | MAF  | Call rate*                                 | p for HWE          |                           |                     | MAF        | Inclusion criteria | SNPs for analysis    | Analysis software |
| deCODE       | Illumina HumanHap 300 370CNV                                                            | BeadStudio                 | ≥ 1% | ≥ 96%                                      | > 10 <sup>-6</sup> | 290,449                   | IMPUTE              | ≥ 1%       | proper-info ≥ 0.40 | 14                   | SNPtest           |
| Fenland      | Illumina MetaboChip                                                                     | GeneCall                   | -    | ≥ 90%                                      | > 10 <sup>-6</sup> | 167,085                   | -                   | -          | -                  | 14                   | Plink             |
| Genmets      | Illumina 610K                                                                           | Illuminus                  | ≥ 1% | ≥ 95%                                      | > 10 <sup>-6</sup> | 555,388                   | MACH 1.0.10         | ≥ 1%       | r2-hat ≥ 0.83      | 14                   | Probabel          |
| MRC Ely      | Illumina MetaboChip                                                                     | GeneCall                   | -    | ≥ 90%                                      | > 10 <sup>-6</sup> | 149,302                   | -                   | -          | -                  | 14                   | Plink             |
| ORCADES      | Illumina Hap300v2                                                                       | BeadStudio                 | ≥ 2% | ≥ 98%                                      | > 10 <sup>-6</sup> | 294,123                   | MACH                | ≥ 1%       | r2-hat ≥ 0.30      | 14                   | ProbABEL          |
| Twins UK     | Illumina HumanHap 300<br>Illumina HumanHap 610Q<br>Illumina 1M-Duo<br>Illumina 1.2M Duo | BRLMM                      | ≥ 1% | ≥97% for<br>MAF>5%<br>≥99% for<br>1<MAF<5% | > 10 <sup>-6</sup> | 874,733                   | IMPUTE v2           | -          | proper-info ≥ 0.40 | 33                   | Merlin, PLINK     |
| VIS          | Illumina Hap300v1                                                                       | BeadStudio                 | ≥ 2% | ≥ 95%                                      | > 10 <sup>-6</sup> | 308,996                   | MACH                | ≥ 1%       | r2-hat ≥ 0.30      | 14                   | ProbABEL          |
| Whitehall II | Illumina HumanCVD BeadChip, 50K                                                         | Beadstudio                 | ≥ 1% | ≥ 98%                                      | > 10 <sup>-6</sup> | 48,032                    | -                   | -          | -                  | 1                    | SAS               |

\* SNP genotyping success rate; i.e. minimum percentage of successfully genotyped samples per SNP

**Supplementary Note - Table 8.** Study-specific descriptive statistics for stage 2 and stage 3 follow-up studies.

| Study                 | Men   |                       |                                     |                        |                         |                                    |                   | Women |                       |                                     |                        |                         |                                    |                              |
|-----------------------|-------|-----------------------|-------------------------------------|------------------------|-------------------------|------------------------------------|-------------------|-------|-----------------------|-------------------------------------|------------------------|-------------------------|------------------------------------|------------------------------|
|                       | N     | Age, yrs<br>mean (sd) | BMI, kg/m <sup>2</sup><br>mean (sd) | Height, m<br>mean (sd) | Weight, kg<br>mean (sd) | Total fat mass,<br>kg<br>mean (sd) | Fat%<br>mean (sd) | N     | Age, yrs<br>mean (sd) | BMI, kg/m <sup>2</sup><br>mean (sd) | Height, m<br>mean (sd) | Weight, kg<br>mean (sd) | Total fat mass,<br>kg<br>mean (sd) | Total body fat%<br>mean (sd) |
| BPPP                  | 927   | 48.4 (15.8)           | 26.8 (3.8)                          | 1.77(0.07)             | 84.0 (13.1)             | 20.8 (6.7)                         | 24.3 (6.7)        | 943   | 48.3 (15.5)           | 26.3 (4.7)                          | 1.64 (0.06)            | 70.7 (12.8)             | 34.4 (7.5)                         | 25.1 (9.4)                   |
| deCODE                | 533   | 62.5 (15.2)           | 27.1 (4.0)                          | 1.76 (0.08)            | 83.9 (14.8)             | 23.9 (8.8)                         | 26.6 (6.0)        | 2,014 | 56.9 (15.9)           | 25.8 (4.8)                          | 1.64 (0.07)            | 69.9 (13.3)             | 27.2 (9.2)                         | 37.0 (6.8)                   |
| EPIC-Norfolk          | 5,210 | 59.1 (9.0)            | 25.8 (2.7)                          | 1.74 (0.06)            | 78.5 (9.7)              | 18.2 (6.2)                         | 22.9 (5.7)        | 5,072 | 58.1 (8.9)            | 25.1 (3.3)                          | 1.61 (0.06)            | 65.4 (9.4)              | 25.7 (8.4)                         | 38.7 (8.3)                   |
| Fenland               | 1,465 | 46.9 (7.2)            | 27.0 (4.1)                          | 1.78 (0.07)            | 85.4 (14.1)             | -                                  | 23.7 (5.7)        | 1,667 | 46.9 (7.0)            | 26.5 (5.4)                          | 1.64 (0.06)            | 71.1 (15.3)             | -                                  | 35.7 (7.2)                   |
| GenMets cases         | 422   | 49.2 (10.4)           | 25.4 (3.1)                          | 1.76 (0.06)            | 78.0 (10.4)             | 15.9 (5.7)                         | 19.8 (5.0)        | 447   | 52.0 (11.6)           | 25.1 (4.1)                          | 1.64 (0.06)            | 65.3 (10.4)             | 20.5 (7.8)                         | 29.9 (6.7)                   |
| GenMets controls      | 425   | 49.2 (10.4)           | 29.4 (3.6)                          | 1.78 (0.07)            | 91.2 (12.6)             | 23.9 (7.7)                         | 25.3 (5.4)        | 432   | 52.4 (11.7)           | 29.7 (4.9)                          | 1.64 (0.06)            | 76.6 (13.4)             | 28.9 (9.4)                         | 36.1 (6.0)                   |
| METSIM                | 7,470 | 57.5 (7.0)            | 27.2 (4.1)                          | 1.76 (0.06)            | 84.3 (13.9)             | 20.8 (8.0)                         | 24.1 (6.5)        | -     | -                     | -                                   | -                      | -                       | -                                  | -                            |
| MRC Ely               | 737   | 61.5 (9.1)            | 27.4 (4.0)                          | 1.74 (0.07)            | 83.1 (13.3)             | 22.4 (7.0)                         | 26.6 (5.2)        | 845   | 60.8 (9.2)            | 27.3 (5.4)                          | 1.61 (0.06)            | 71.1 (14.4)             | 29.0 (10.2)                        | 39.9 (6.5)                   |
| MrOS Sweden - Hologic | 917   | 75.2 (3.2)            | 25.9 (3.2)                          | 1.76 (0.06)            | 80.2 (11.2)             | 18.5 (5.7)                         | 22.7 (4.8)        | -     | -                     | -                                   | -                      | -                       | -                                  | -                            |
| MrOS Sweden - Lunar   | 1,946 | 75.5 (3.2)            | 26.5 (3.6)                          | 1.74 (0.07)            | 80.7 (12.1)             | 23.7 (7.9)                         | 28.7 (6.5)        | -     | -                     | -                                   | -                      | -                       | -                                  | -                            |
| ORCADES               | 334   | 54.0 (15.6)           | 28.1 (4.1)                          | 1.75 (0.06)            | 85.8 (13.0)             | 23.3 (8.6)                         | 26.5 (6.8)        | 385   | 52.5 (15.7)           | 27.3 (5.3)                          | 1.61 (0.06)            | 70.6 (13.8)             | 26.5 (10.2)                        | 36.2 (7.3)                   |
| RISC                  | 560   | 43.4 (8.6)            | 26.4 (3.5)                          | 1.78 (0.07)            | 83.9 (12.6)             | 22.1 (6.6)                         | 22.1 (6.6)        | 687   | 44.3 (8.1)            | 24.8 (4.4)                          | 1.65 (0.06)            | 67.5 (12.4)             | 22.6 (9.2)                         | 32.3 (7.7)                   |
| Twins UK              | 137   | 49.1 (12.8)           | 26.0 (3.1)                          | 1.75 (0.06)            | 80.0 (10.0)             | -                                  | 22.0 (6.0)        | 1,554 | 49.0 (12.9)           | 25.4 (4.6)                          | 1.62 (0.06)            | 66.8 (12.5)             | -                                  | 34.3 (7.5)                   |
| ULSAM                 | 960   | 71.0 (0.6)            | 26.0 (3.2)                          | 1.75 (0.06)            | 79.7 (10.8)             | -                                  | -                 | -     | -                     | -                                   | -                      | -                       | -                                  | -                            |
| VIS                   | 315   | 55.7 (14.8)           | 27.5 (3.7)                          | 1.76 (0.07)            | 85.5 (13.4)             | 31.7 (8.1)                         | 37.2 (7.9)        | 466   | 56.4 (16.1)           | 27.2 (4.7)                          | 1.62 (0.07)            | 71.3 (12.8)             | 26.1 (7.6)                         | 36.7 (8.4)                   |
| Whitehall II          | 2,958 | 60.5 (5.8)            | 26.4 (3.7)                          | 1.76 (0.06)            | 81.6 (12.4)             | 20.0 (7.2)                         | 23.9 (5.5)        | 991   | 60.4 (5.9)            | 26.6 (5.2)                          | 1.62 (0.06)            | 69.7 (14.2)             | 25.6 (9.8)                         | 35.7 (7.0)                   |

**Supplementary Note - Table 9.** Samples and assays used for the measurement of circulating levels of glucose, insulin, leptin, and adiponectin in the stage 3 follow-up studie:

| Study        | Glucose Sample                                                    | Glucose Assay                                                                                               | Insulin Sample                                                    | Insulin Assay                                                                                                    | Leptin Sample                                                                                  | Leptin Assay                                                                                                                           | Adiponectin Sample | Adiponectin Assay                                                                                                                                      |
|--------------|-------------------------------------------------------------------|-------------------------------------------------------------------------------------------------------------|-------------------------------------------------------------------|------------------------------------------------------------------------------------------------------------------|------------------------------------------------------------------------------------------------|----------------------------------------------------------------------------------------------------------------------------------------|--------------------|--------------------------------------------------------------------------------------------------------------------------------------------------------|
| METSIM       | Fasting plasma, OGTT (30,120 mins)                                | Enzymatic hexokinase photometric assay (Konelab System Reagents, Thermo Fischer Scientific, Vaasa, Finland) | Fasting plasma, OGTT (30,120 mins)                                | Immunoassay (ADVIA Centaur Insulin RIA, no. 02230141, Siemens Medical Solutions Diagnostics, Tarrytown, NY, USA) | NA                                                                                             | NA                                                                                                                                     | Fasting plasma     | Enzyme immunoassay (ELISA) kit (Linco Research, St. Charles, MI, USA)                                                                                  |
| MRC Ely      | Fasting plasma, OGTT (30,60,120 mins)                             | Hexokinase assay                                                                                            | Fasting plasma, OGTT (30,60,120 mins)                             | Immunometric assay                                                                                               | Fasting blood                                                                                  | Two-step time-resolved fluorometric assays of the 1235 AutoDELFLIA (PerkinElmer Lifesciences, Boston, MA) automatic immunoassay system | Fasting blood      | Two-step time-resolved fluorometric assays of the 1235 AutoDELFLIA (PerkinElmer Lifesciences, Boston, MA) automatic immunoassay system                 |
| MrOS Sweden  | NA                                                                | NA                                                                                                          | NA                                                                | NA                                                                                                               | Fasting serum (Uppsala centre, n=956)<br>Non-fasting serum (Malmö and Uppsala centres n=1,926) | Commercially available kit (Diagnostics Systems Laboratories, Webster, TX, USA)                                                        | Fasting plasma     | Enzyme immunoassay (ELISA) kit (Linco Research, St. Charles, MI, USA)                                                                                  |
| RISC         | Euglycemic-Hyperinsulinemic-clamp; OGTT (0, 30, 60, 90, 120 mins) | Glucose oxidase method (Cobas Integra; Roche Diagnostics, Basel, Switzerland)                               | Euglycemic-Hyperinsulinemic-clamp; OGTT (0, 30, 60, 90, 120 mins) | Specific time-resolved fluoroimmunoassay (AutoDELFLIA Insulin Kit; Wallac Oy, Turku, Finland)                    | Fasting blood                                                                                  | Two-step time-resolved fluorometric assays of the 1235 AutoDELFLIA (PerkinElmer Lifesciences, Boston, MA) automatic immunoassay system | Fasting blood      | In-house time-resolved immunofluorometric assay (TR-IFMA) on the basis of two antibodies and recombinant human adiponectin (R&D Systems, Abingdon, UK) |
| ULSAM        | Euglycemic-Hyperinsulinemic-clamp; OGTT (0, 30, 60, 90, 120 mins) | Glucose dehydrogenase method (Gluc-DH, Merck, Darmstadt, Germany)                                           | Euglycemic-Hyperinsulinemic-clamp; OGTT (0, 30, 60, 90, 120 mins) | Enzymatic-immunological assay (Enzymun, Boehringer Mannheim, Germany)                                            | NA                                                                                             | NA                                                                                                                                     | NA                 | NA                                                                                                                                                     |
| Whitehall II | Fasting plasma, OGTT (0, 120 mins)                                | Electrochemical glucose oxidase method                                                                      | Fasting plasma, OGTT (120 mins)                                   | Double antibody ELISA                                                                                            | NA                                                                                             | NA                                                                                                                                     | NA                 | NA                                                                                                                                                     |

NA, not available for analyses

## 2.2. AUTHOR CONTRIBUTIONS

### **Overseeing of the project**

Tuomas O Kilpeläinen, Ruth JF Loos

### **Writing group (drafted and edited manuscript)**

Francis M Finucane, Caroline S Fox, Tuomas O Kilpeläinen (lead), Ruth JF Loos (chair), Elizabeth K Speliotes, M Carola Zillikens

### **Contributed to discussion**

Francis M Finucane, Caroline S Fox, Tuomas O Kilpeläinen, Claudia Langenberg, Ruth JF Loos, Stephen O’Rahilly, David B Savage, Robert K Semple, Elizabeth K Speliotes, Antonio Vidal-Puig, Nicholas J Wareham, M Carola Zillikens

### **Meta-analyses of body fat percentage**

Tuomas O Kilpeläinen, Ruth JF Loos, Janina S Ried

### **Look-up of data in GWA meta-analysis of fat distribution**

Ingrid B Borecki, L Adrienne Cupples, Gudny Eiriksdottir, Mary F Feitosa, Caroline S Fox (lead), Melissa Garcia, Vilmondur Gudnason, Tamara B Harris, David Karasik, Douglas P Kiel, Lauren J. Kim, Yongmei Liu, Albert Vernon Smith, Yanhua Zhou

### **Meta-analyses of blood lipids, anthropometric traits, obesity and overweight**

Tuomas O Kilpeläinen, Ruth JF Loos

### **Meta-analyses of insulin sensitivity traits**

Tuomas O Kilpeläinen, Claudia Langenberg, Ruth JF Loos

### **Meta-analyses of leptin and adiponectin**

Tuomas O Kilpeläinen, Ruth JF Loos

### **Gene-Expression analyses**

Deborah J Clegg, Kathryn E Davis, José Manuel Fernández-Real, José Maria Moreno, Belén Peral, Eric Schadt, Gudmar Thorleifsson

### **Project design, management and coordination of contributing cohorts**

#### ***Stage 1 – genome-wide association cohorts***

(AGES) Gudny Eiriksdottir, Vilmondur Gudnason, Tamara B Harris; (AMISH) Mao Fu, Braxton D Mitchell, Jeffery R O’Connell, Alan R Shuldiner; (BPPP) Leif Groop, Joel Hirschhorn, Bo Isomaa; (CHS) Robert C Kaplan, Bruce M Psaty; (COLAUS) Vincent Mooser, Peter Vollenweider, Gérard Waeber; (EPIC-NORFOLK) Inês Barroso, Ruth JF Loos, Nicholas J Wareham; (FAMHS) Ingrid B Borecki; (FENLAND) Ruth JF Loos, Nicholas J Wareham; (FRAMINGHAM) Caroline S Fox, David Karasik, Douglas P Kiel; (GOOD) Mattias Lorentzon, Claes Ohlsson; (KORA) Angela Döring, H-Erich Wichmann; (LOLIPOP) John C Chambers, Jaspal S Kooner; (ROTTERDAM) Albert Hofman, Fernando Rivadeneira, André G Uitterlinden, M. Carola Zillikens; (TWINS UK) Nicole Soranzo

#### ***Stage 2 – follow-up cohorts***

(deCODE) Kari Stefansson, Unnur Styrkarsdottir, Unnur Thorsteinsdottir; (EPIC-NORFOLK) Kay-Tee Khaw, Ruth JF Loos, Nicholas J Wareham; (FENLAND) Ruth JF Loos, Nicholas J Wareham; (GENMETS) Leena Peltonen, Samuli Ripatti, Veikko Salomaa; (METSIM) Johanna Kuusisto, Markku Laakso; (MRC ELY) Ruth JF Loos, Nicholas J Wareham; (MrOS SWEDEN) Claes Ohlsson; (ORCADES) Harry Campbell, James F Wilson; (TWINS UK) Nicole Soranzo; (VIS-CROATIA) Igor Rudan, Alan F Wright

#### ***Stage 3 – follow-up cohorts***

(Health ABC) Yongmei Liu; (RISC) Mark Walker; (ULSAM) Erik Ingelsson; (WHITEHALL II) Steve E Humphries, Mika Kivimäki, Meena Kumari, Philippa J Talmud

### **Phenotyping of contributing cohorts**

#### ***Stage 1 – genome-wide association cohorts***

(AMISH) Alan R Shuldiner; (CHS) Alice M Arnold, Robert C Kaplan, Bruce M Psaty; (ERF) Oostra A Ben, Cornelia M van Duijn, M Carola Zillikens; (FRAMINGHAM) David Karasik, Douglas P Kiel; (GOOD) John-Olov Jansson, Mattias Lorentzon, Claes Ohlsson, Liesbeth Vandenput; (KORA) Angela Döring; (LOLIPOP) John C Chambers, Jaspal S Kooner; (ROTTERDAM) Albert Hofman; (TWINS UK) Massimo Mangino, Timothy D. Spector

***Stage 2 – follow-up cohorts***

(BPPP) Leif Groop, Bo Isomaa; (deCODE) Gunnar Sigurdsson, Unnur Styrkarsdottir; (EPIC-Norfolk) Robert N Luben; (GENMETS) Antti Jula, Satu Männistö, Markus Perola; (MrOS SWEDEN) Magnus Karlsson, Östen Ljunggren, Dan Mellström, Claes Ohlsson, Liesbeth Vandenput; (ORCADES) Sarah H Wild; (VIS-CROATIA) Igor Rudan; Tatjana Skaric-Juric; (TWINS UK) Massimo Mangino, Timothy D. Spector

***Stage 3 – follow-up cohorts***

(Health ABC) Yongmei Liu; (RISC) Mark Walker; (WHITEHALL II) Mika Kivimäki, Meena Kumari

**Genotyping of contributing cohorts**

***Stage 1 – genome-wide association cohorts***

(AGES) Melissa Garcia, Lauren J. Kim; (AMISH) Mao Fu; (CHS) Talin Haritunians; (ERF) Yurii S Aulchenko, Oostra A Ben, Cornelia M van Duijn; (GOOD) John-Olov Jansson, Mattias Lorentzon, Claes Ohlsson; (KORA) Norman Klopp; (LOLIPOP) John C Chambers, Jaspal S Kooner; (ROTTERDAM) Karol Estrada, Fernando Rivadeneira, André G Uitterlinden; (TWINS UK) Massimo Mangino, So Youn Shin, Nicole Soranzo, Timothy Spector

***Stage 2 – follow-up cohorts***

(BPPP) Gandace Guiducci; (EPIC-Norfolk) Robert N Luben; (GENMETS) Inês Barroso, Markus Perola; (MrOS SWEDEN) Magnus Karlsson, Östen Ljunggren, Dan Mellström, Claes Ohlsson; (ORCADES) James F Wilson; (TWINS UK) Massimo Mangino, So Youn Shin, Nicole Soranzo, Timothy Spector; (VIS-CROATIA) Caroline Hayward

***Stage 3 – follow-up cohorts***

(RISC) Laura Pascoe; (ULSAM) Ann-Christine Syvänen; (WHITEHALL II) Steve E Humphries, Philippa J Talmud

**Analyses of contributing cohorts**

***Stage 1 – genome-wide association cohorts***

(AGES) Albert Vernon Smith; (AMISH) Braxton D. Mitchell, Jeffery R O'Connell; (CHS) Nicole L Glazer, Barbara McKnight; (COLAUS) Jacques S Beckmann, Kijoung S Song; (EPIC-NORFOLK) Jing-Hua Zhao; (ERF) Najaf Amin; (FENLAND) Jian'an Luan; (FAMHS) Mary Feitosa; (FRAMINGHAM) L Adrienne Cupples, Yanhua Zhou; (GOOD) John-Olov Jansson, Mattias Lorentzon, Claes Ohlsson, Liesbeth Vandenput; (KORA) Christian Gieger, Brigitte Kühnel, Janina S Ried; (LOLIPOP) John C Chambers, Weihua Zhang; (ROTTERDAM) Karol Estrada, Leonie C Jacobs, Fernando Rivadeneira, André G Uitterlinden, M Carola Zillikens; (TWINS UK) So Youn Shin, Nicole Soranzo

***Stage 2 – follow-up cohorts***

(deCODE) Bjarni Halldorsson, Unnur Styrkarsdottir; (BPPP) Elizabeth K Speliotes, Sailaja Vedantam; (EPIC-NORFOLK) Tuomas O Kilpeläinen; (FENLAND) Tuomas O Kilpeläinen, Jian'an Luan; (GENMETS) Emmi Tikkanen; (METSIM) Alena Stančáková; (MRC ELY) Tuomas O Kilpeläinen, Jian'an Luan; (MrOS SWEDEN) Claes Ohlsson, Liesbeth Vandenput; (ORCADES) Caroline Hayward; (TWINS UK) So Youn Shin, Nicole Soranzo; (VIS-CROATIA) Caroline Hayward

***Stage 3 – follow-up cohorts***

(Health ABC) Yongmei Liu; (RISC) Laura Pascoe; (ULSAM) Erik Ingelsson, Ci Song; (WHITEHALL II) Meena Kumari



## 2.3. ACKNOWLEDGEMENTS

The work of Stephen O’Rahilly, Robert K. Semple, and David B. Savage is supported by MRC Centre for Obesity and Related Metabolic Disease and the Cambridge NIHR Biomedical Research Centre. Belén Peral and José M. Fernández-Real were supported by Grants SAF-2009-10461 (BP) and SAF-2008-02073 (JMFR) from the Ministerio de Ciencia e Innovación, Spain.

**AGES (Age, Gene/Environment Susceptibility-Reykjavik Study)** – The AGES study is funded by National Institutes of Health contract N01-AG-12100, the U.S. National Institute on Aging Intramural Research Program, Hjartavernd (the Icelandic Heart Association), and the Althingi (the Icelandic Parliament). Components of the study were also supported by the U.S. National Eye Institute, the U.S. National Institute on Deafness and Other Communication Disorders, and the U.S. National Heart, Lung, and Blood Institute. This work was supported in part by the Intramural Research Program, National Institutes of Health.

**Amish HAPI Heart Study (Amish Heredity and Phenotype Intervention Heart Study)** – The work was supported by grant numbers U01 HL84756, U01HL72515, R01 AG18728, R01 AR046838, R01 HL088119, NIH P30 DK072488, AHA 10SDG269004. Funding and support were also provided by the University of Maryland General Clinical Research Center (M01 RR 16500), the Department of Veterans Affairs, and Veterans Affairs Medical Center, Baltimore Geriatric Research, Education and Clinical Center (GRECC).

**BPPP (Botnia Prevalence, Prediction and Prevention of Diabetes Study)** – The Botnia study has been supported by grants from Folkhälsan Research Foundation, Sigríd Juselius Foundation, Ministry of Education, Nordic Center of Excellence in Disease Genetics, Gyllenberg Foundation, Swedish Cultural Foundation in Finland, Finnish Diabetes Research Foundation, Foundation for Life and Health in Finland, Finnish Medical Society, Paavo Nurmi Foundation, Perklén Foundation, Ollqvist Foundation, Närpes Health Care Foundation, the Municipal Health Care Center and Hospital in Jakobstad, Health Care Centers in Vasa, Närpes and Korsholm. This work was also partially supported by NIH grant R01 DK075787 to JNH and by K23 DK080145 to EKS.

**CHS (Cardiovascular Health Study)** – The CHS research reported in this article was supported by contract numbers N01-HC-85079 through N01-HC-85086, N01-HC-35129, N01 HC-15103, N01 HC-55222, N01-HC-75150, N01-HC-45133, grant numbers U01 HL080295 and R01 HL087652 from the National Heart, Lung, and Blood Institute, grant number 1R01AG031890-01 from the National Institute of Aging (to RK), and with additional contribution from the National Institute of Neurological Disorders and Stroke. A full list of principal CHS investigators and institutions can be found at <http://www.chs-nhlbi.org/pi.htm>. DNA handling and genotyping was supported in part by National Center for Research Resources grant M01RR00425 to the Cedars-Sinai General Clinical Research Center Genotyping core, National Institute of Diabetes and Digestive and Kidney Diseases grant DK063491 to the Southern California Diabetes Endocrinology Research Center, and the Cedars-Sinai Board of Governors' Chair in Medical Genetics (JIR).

**CoLaus (Cohorte Lausannoise)** – The CoLaus study received financial contributions from GlaxoSmithKline, the Faculty of Biology and Medicine of Lausanne, and the Swiss National Science Foundation (33CSCO 122661). The authors thank Dawn Waterworth, Co-PI of the CoLaus study. Special thanks to Murielle Bochud, Yolande Barreau, Mathieu Firmann, Vladimir Mayor, Anne Lise Bastian, Binasa Ramic, Martine Moranville, Martine Baumer, Marcy Sagette, Jeanne Ecoffey and Sylvie Mermoud for data collection. JSB is supported by the Centre Hospitalier Universitaire Vaudois and the University of Lausanne, Switzerland, the Swiss National Science Foundation (grants nb 310000-112552) and the European Union HEALTHF4-2007-201550 HYPERGENES grant. SB is supported by the Giorgi-Cavaglieri Foundation, the Swiss National Science Foundation (grant 3100AO-116323/1), the Leenaards Foundation, the European Union HEALTH-F4-2007-201550 HYPERGENES grant and the Swiss Institute of Bioinformatics.

**deCODE (deCODE genetics)** – The study was funded in part by the European Community’s Seventh Framework Programme (FP7/2007-2013)/grant agreement HEALTH-F2-2008-201865-GEFOS and (FP7/2007-2013) and ENGAGE project grant agreement HEALTH-F4-2007-201413). We wish to thank the study volunteers for their contributions to this project, and the staff at the deCODE core facilities.

**EPIC-Norfolk (European Prospective Investigation into Cancer and Nutrition – Norfolk)** – The EPIC Norfolk Study is funded by program grants from the Medical Research Council UK and Cancer Research UK; and by additional support from the European Union; Stroke Association; British Heart Foundation; Department of Health; Food Standards Agency; and the Wellcome Trust. IB acknowledges support from EU FP6 funding (contract no LSHM-CT-2003-503041).

**ERF (Erasmus Rucphen Family) (EUROSPAN)** – The ERF study was supported by EUROSPAN (European Special Populations Research Network) through the European Commission FP6 STRP grant (018947; LSHG-CT-2006-01947). The ERF study was further supported by grants from the Netherlands Organization for Scientific Research (NWO), Erasmus MC, the Centre for Medical Systems Biology (CMSB1 and CMSB2) and the Netherlands Genomics Initiative (NGI).

**FamHS (Family Heart Study)** – The FamHS is funded by a NHLBI grant 5R01HL08770003, and NIDDK grants 5R01DK06833603 and 5R01DK07568102.

**Fenland (Fenland Study)** – The Fenland Study is funded by the Wellcome Trust and the Medical Research Council, as well as by the Support for Science Funding programme and CamStrad. We are grateful to all the volunteers for their time and help, and to the General Practitioners and practice staff for help with recruitment. We thank the Fenland Study co-ordination team and the Field Epidemiology team of the MRC Epidemiology Unit for recruitment and clinical testing.

**FRAM (Framingham Heart Study)** – This research was conducted in part using data and resources from the Framingham Heart Study of the National Heart Lung and Blood Institute of the National Institutes of Health and Boston University School of Medicine. The analyses reflect intellectual input and resource development from the Framingham Heart Study investigators participating in the SNP Health Association Resource (SHARe) project. This work was partially supported by the National Heart, Lung and Blood Institute's Framingham Heart Study (Contract No. N01-HC-25195) and its contract with Affymetrix, Inc for genotyping services (Contract No. N02-HL-6-4278). A portion of this research utilized the Linux Cluster for Genetic Analysis (LinGA-II) funded by the Robert Dawson Evans Endowment of the Department of Medicine at Boston University School of Medicine and Boston Medical Center. Whole body Dual Energy X-ray Absorptiometry data was supported by the National Institute for Arthritis, Musculoskeletal and Skin Diseases and the National Institute on Aging R01 AR/AG 41398 and by the Men's Associates of Hebrew SeniorLife.

**Genmets (Health 2000 / GENMETS substudy)** – Wellcome Trust, L.P. is supported by the Center of Excellence for Complex Disease Genetics of the Academy of Finland (grants 213506, 129680), the Biocentrum Helsinki Foundation and The Nordic Center of Excellence in Disease Genetics. VS was supported by the Academy of Finland (grant number 129494), Sigrid Juselius Foundation and the Finnish Foundation for Cardiovascular Research. IB was supported by the Wellcome Trust grant 077016/Z/05/Z and United Kingdom NIHR Cambridge Biomedical Research Centre. MP was supported by the Finnish Foundation for Cardiovascular Research and Finnish Academy SALVE-program PUBGENSENS grant no 10404. SM is supported by the Academy of Finland (grant number 141005).

**GOOD (Gothenburg Osteoporosis and Obesity Determinants Study)** – The GOOD Study is funded by the Swedish Research Council (K2010-54X-09894-19-3, K2010-52X-20229-05-3, 2006-3832), the Swedish Foundation for Strategic Research, the ALF/LUA research grant in Gothenburg, the Lundberg Foundation, the Emil and Vera Cornell Foundation, the Torsten and Ragnar Söderberg's Foundation, Petrus and Augusta Hedlunds Foundation, the Västra Götaland Foundation, the Göteborg Medical Society, and the Sahlgrenska Center for Cardiovascular and Metabolic Research (CMR, no. A305:188), which is supported by the Swedish Strategic Foundation, and the European Commission grants LSHM-CT-2003-503041 and FP7-KBBE-2010-4-266408. We would like to thank Dr. Tobias A. Knoch, Anis Abuseiris, Luc V. de Zeeuw and Rob de Graaf, as well as their institutions the Erasmus Grid Office, Rotterdam, The Netherlands, and especially the national German MediGRID and Services@MediGRID part of the German D-Grid, both funded by the German Bundesministerium für Forschung und Technology under grants #01 AK 803 A-H and # 01 IG 07015 G for access to their grid resources. In addition, we would like to acknowledge Karol Estrada, Department of Internal Medicine, Erasmus MC, Rotterdam, The Netherlands for advice regarding the grid resources.

**Health ABC (Dynamics of Health, Aging and Body Composition)** - This research was supported by NIA contracts N01AG62101, N01AG62103, and N01AG62106. The genome-wide

association study was funded by NIA grant 1R01AG032098-01A1 to Wake Forest University Health Sciences and genotyping services were provided by the Center for Inherited Disease Research (CIDR). CIDR is fully funded through a federal contract from the National Institutes of Health to The Johns Hopkins University, contract number HHSN268200782096C.

**KORA Studies (Cooperative Health Research in the Region of Augsburg, KOoperative Gesundheitsforschung in der Region Augsburg)** – The KORA research platform was initiated and financed by the Helmholtz Center Munich, German Research Center for Environmental Health, which is funded by the German Federal Ministry of Education and Research (BMBF) and by the State of Bavaria. Part of this work was financed by the German National Genome Research Network (NGFN-2 and NGFNPlus: 01GS0823). Our research was supported within the Munich Center of Health Sciences (MC Health) as part of LMUinnovativ.

**LOLIPOP (London Life Sciences Population Study)** – We thank the participants and research team involved in LOLIPOP. The work was supported by the British Heart Foundation (SP/04/002) and the Wellcome Trust (084723/Z/08/Z). Genotyping for Affymetrix 500K was funded by GlaxoSmithKline. W Zhang was supported by a research grant from GlaxoSmithKline.

**METSIM (Metabolic Syndrome in Men)** – The METSIM Study is funded by grants from the Academy of Finland (Contract no. 124243), The Finnish Heart Foundation, The Finnish Diabetes Foundation, TEKES (Contract no. 1510/31/06), and Commission of the European Community (LSHM-CT-2004-512013 EUGENE2, and HEALTH-F2-2007-201681).

**MRC Ely (MRC Ely Study)** – The MRC Ely Study was funded by the Medical Research Council and the Wellcome Trust. We thank Sarah Dawson, Farzana Shah, Sofie Ashford, Larissa Richardson, Steven Knighton, and Chris Gillson for their rapid and accurate large-scale sample preparation and genotyping, and Jian'an Luan and Stephen Sharp for their statistical support.

**MrOS Sweden (Osteoporotic Fracture in Men Study – Sweden)** – The Osteoporotic Fractures in Men - Sweden (MrOS Sweden) study is supported by the Swedish Research Council, the Swedish Foundation for Strategic Research, the ALF/LUA research grant in Gothenburg, the Lundberg Foundation, the Torsten and Ragnar Söderberg's Foundation, and the Novo Nordisk Foundation.

**ORCADES (Orkney Complex Disease Study (EUROSPAN))** – ORCADES was supported by the Scottish Executive Health Department and the Royal Society, and the European Union framework program 6 EUROSPAN project (contract no. LSHG-CT-2006-018947). DNA extractions were performed at the Wellcome Trust Clinical Research Facility in Edinburgh. We would like to acknowledge the invaluable contributions of Lorraine Anderson, the research nurses in Orkney, and the administrative team in Edinburgh.

**RISC (Relationship between Insulin Sensitivity and Cardiovascular Disease)** – The RISC Study is supported by European Union grant QLG1-CT-2001-01252 and AstraZeneca. Laura Pascoe was the recipient of a joint BBSRC and Unilever UK Ltd case PhD studentship.

**RS (The Rotterdam Study)** – The generation and management of GWAS genotype data was funded by the Netherlands Organisation of Scientific Research NWO Investments (nr. 175.010.2005.011, 911-03-012), the Research Institute for Diseases in the Elderly (014-93-015; RIDE2), the Netherlands Genomics Initiative (NGI)/Netherlands Consortium for Healthy Aging (NCHA) project nr. 050-060-810. We thank Pascal Arp, Mila Jhamai, Dr Michael Moorhouse, Marijn Verkerk, and Sander Bervoets for their help in creating the GWAS database. The Rotterdam Study is funded by Erasmus Medical Center and Erasmus University, Rotterdam, Netherlands Organization for the Health Research and Development (ZonMw), the Research Institute for Diseases in the Elderly (RIDE), the Ministry of Education, Culture and Science, the Ministry for Health, Welfare and Sports, the European Commission (DG XII), and the Municipality of Rotterdam. The authors are very grateful to the participants and staff from the Rotterdam Study (particularly J.H. van den Boogert), the participating general practitioners and the pharmacists. We would like to thank Dr. Tobias A. Knoch, Luc V. de Zeeuw, Anis Abuseiris, and Rob de Graaf as well as their institutions the Erasmus Computing Grid, Rotterdam, The Netherlands, and especially the national German MediGRID and Services@MediGRID part of the German D-Grid, both funded by the German Bundesministerium fuer Forschung und Technology under grants #01 AK 803 A-H and # 01 IG 07015 G, for access to their grid resources.

**TwinsUK** – The study was funded by the Wellcome Trust; European Community's Seventh Framework Programme (FP7/2007-2013)/grant agreement HEALTH-F2-2008-201865-GEFOS and (FP7/2007-2013), ENGAGE project grant agreement HEALTH-F4-2007-201413 and the FP-5 GenomEUtwin Project (QLG2-CT-2002-01254). The study also receives support from the Dept of Health via the National Institute for Health Research (NIHR) comprehensive Biomedical Research Centre award to Guy's & St Thomas' NHS Foundation Trust in partnership with King's College London. TDS is an NIHR senior Investigator. The project also received support from a Biotechnology and Biological Sciences Research Council (BBSRC) project grant. (G20234) .The authors acknowledge the funding and support of the National Eye Institute via an NIH/CIDR genotyping project (PI: Terri Young). Genotyping of TwinsUK samples: We thank the staff from the Genotyping Facilities at the Wellcome Trust Sanger Institute for sample preparation, Quality Control and Genotyping led by Leena Peltonen and Panos Deloukas; Le Centre National de Génotypage, France, led by Mark Lathrop, for genotyping; Duke University, North Carolina, USA, led by David Goldstein, for genotyping; and the Finnish Institute of Molecular Medicine, Finnish Genome Center, University of Helsinki, led by Aarno Palotie. Genotyping was also performed by CIDR as part of an NEI/NIH project grant. NS is supported by the Wellcome Trust (Core Grant Number 091746/Z/10/Z).

**ULSAM (Uppsala Longitudinal Study of Adult Men)** – Genotyping was performed by the SNP Technology Platform in Uppsala ([www.genotyping.se](http://www.genotyping.se)), which has been supported by Uppsala University and the Knut and Alice Wallenberg Foundation.

**VIS-CROATIA (EUROSPAN)** – The work is supported by grants #309-0061194-2023 (to GL), #216-1080315-0302 (to IR) and #196-1962766-2747 (to NSN) from the Croatian Ministry of Science, Education and Sport; by European Union framework program 6 EUROSPAN project (contract no. LSHG-CT-2006-018947). Studies carried out in the Croatian island of Vis were supported by Medical Research Council UK (HC, AFW, NDH and IR). The authors collectively thank a large number of individuals for their help in organizing, planning and carrying out the field work related to the project: Professor Pavao Rudan and staff of the Institute for Anthropological Research in Zagreb, Croatia; Professor Stipan Jankovic and staff at the University of Split Medical School; Professor Ariana Vorko-Jovic and staff and medical students of the Andrija Stampar School of Public Health of the Faculty of Medicine, University of Zagreb, Croatia; Dr Branka Salzer from the biochemistry lab "Salzer", Croatia; local general practitioners and nurses; and the employees of several other Croatian institutions who participated in the field work. including but not limited to the University of Rijeka, Croatia; Croatian Institute of Public Health; Institutes of Public Health in Split and Dubrovnik, Croatia. SNP Genotyping of the Vis samples was carried out by the Genetics Core Laboratory at the Wellcome Trust Clinical Research Facility, WGH, Edinburgh, Scotland.

**Whitehall II** – Genotyping of IBD cardiochip in WH-II was supported by the British Heart Foundation (BHF) PG/07/133/24260, RG/08/008, SP/07/007/23671. S.E.H. is a BHF Chairholder. M. Kumari's time on this manuscript was partially supported by the National Heart Lung and Blood Institute (NHLBI: HL36310). The WH-II study has been supported by grants from the Medical Research Council; British Heart Foundation; Health and Safety Executive; Department of Health; National Institute on Aging, NIH, US (AG13196); Agency for Health Care Policy Research (HS06516); and the John D. and Catherine T. MacArthur Foundation Research Networks on Successful Midlife Development and Socio-economic Status and Health.

## 2.4. COMPETING INTERESTS STATEMENT

Inês Barroso and spouse own stock in Incyte Ltd and GlaxoSmithKline.

Kari Stefansson, Gudmar Thorleifsson, Unnur Throsteinsdottir, and Unnur Styrkarsdottir are employed by deCODE Genetics.

Vincent Mooser is a full time employee of GlaxoSmithKline. Gérard Waeber and Peter Vollenweider received funding from GlaxoSmithKline to build the CoLaus Study.
